# Supplementary material for: Next-generation reference intervals for pediatric hematology
Source: publisher site journal article supplement (doi:10.1515/cclm-2018-1236), 2019-04-21
Supplement: Supplementary file 1 [file Supplemental Material for the Reviewer only.docx]

**Discrete reference intervals before joining to continuous percentile charts:**

The following figures show the reference intervals for discrete age intervals/age bins before joining to continuous percentile charts:

**
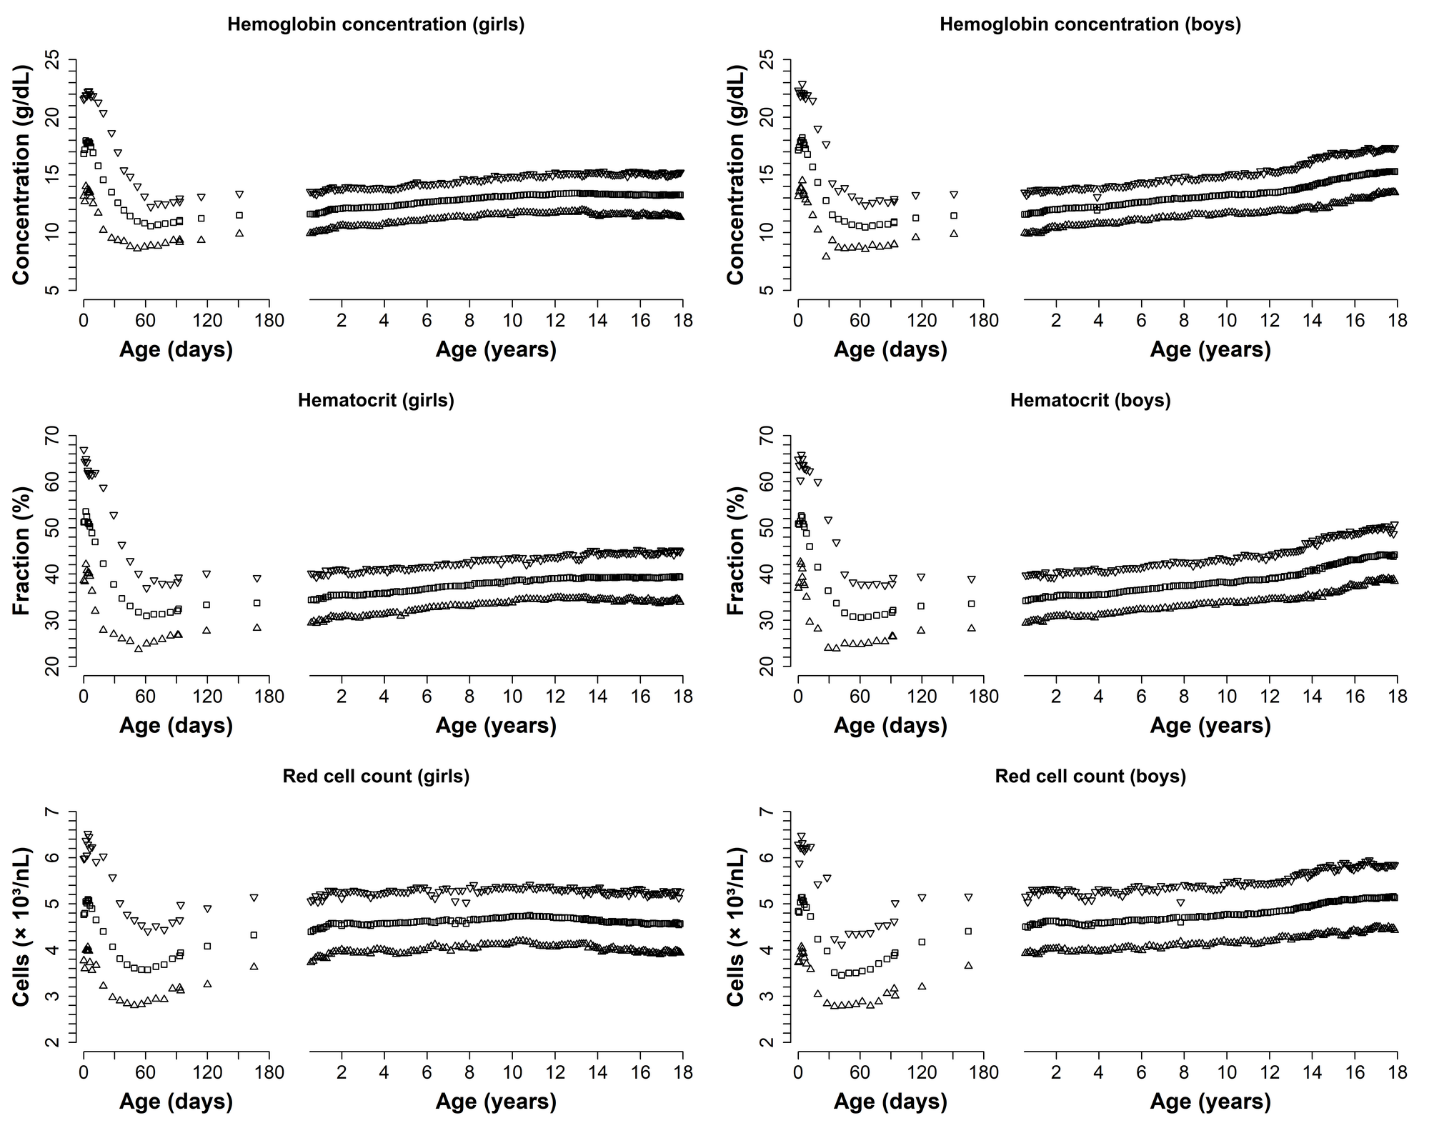
**

**
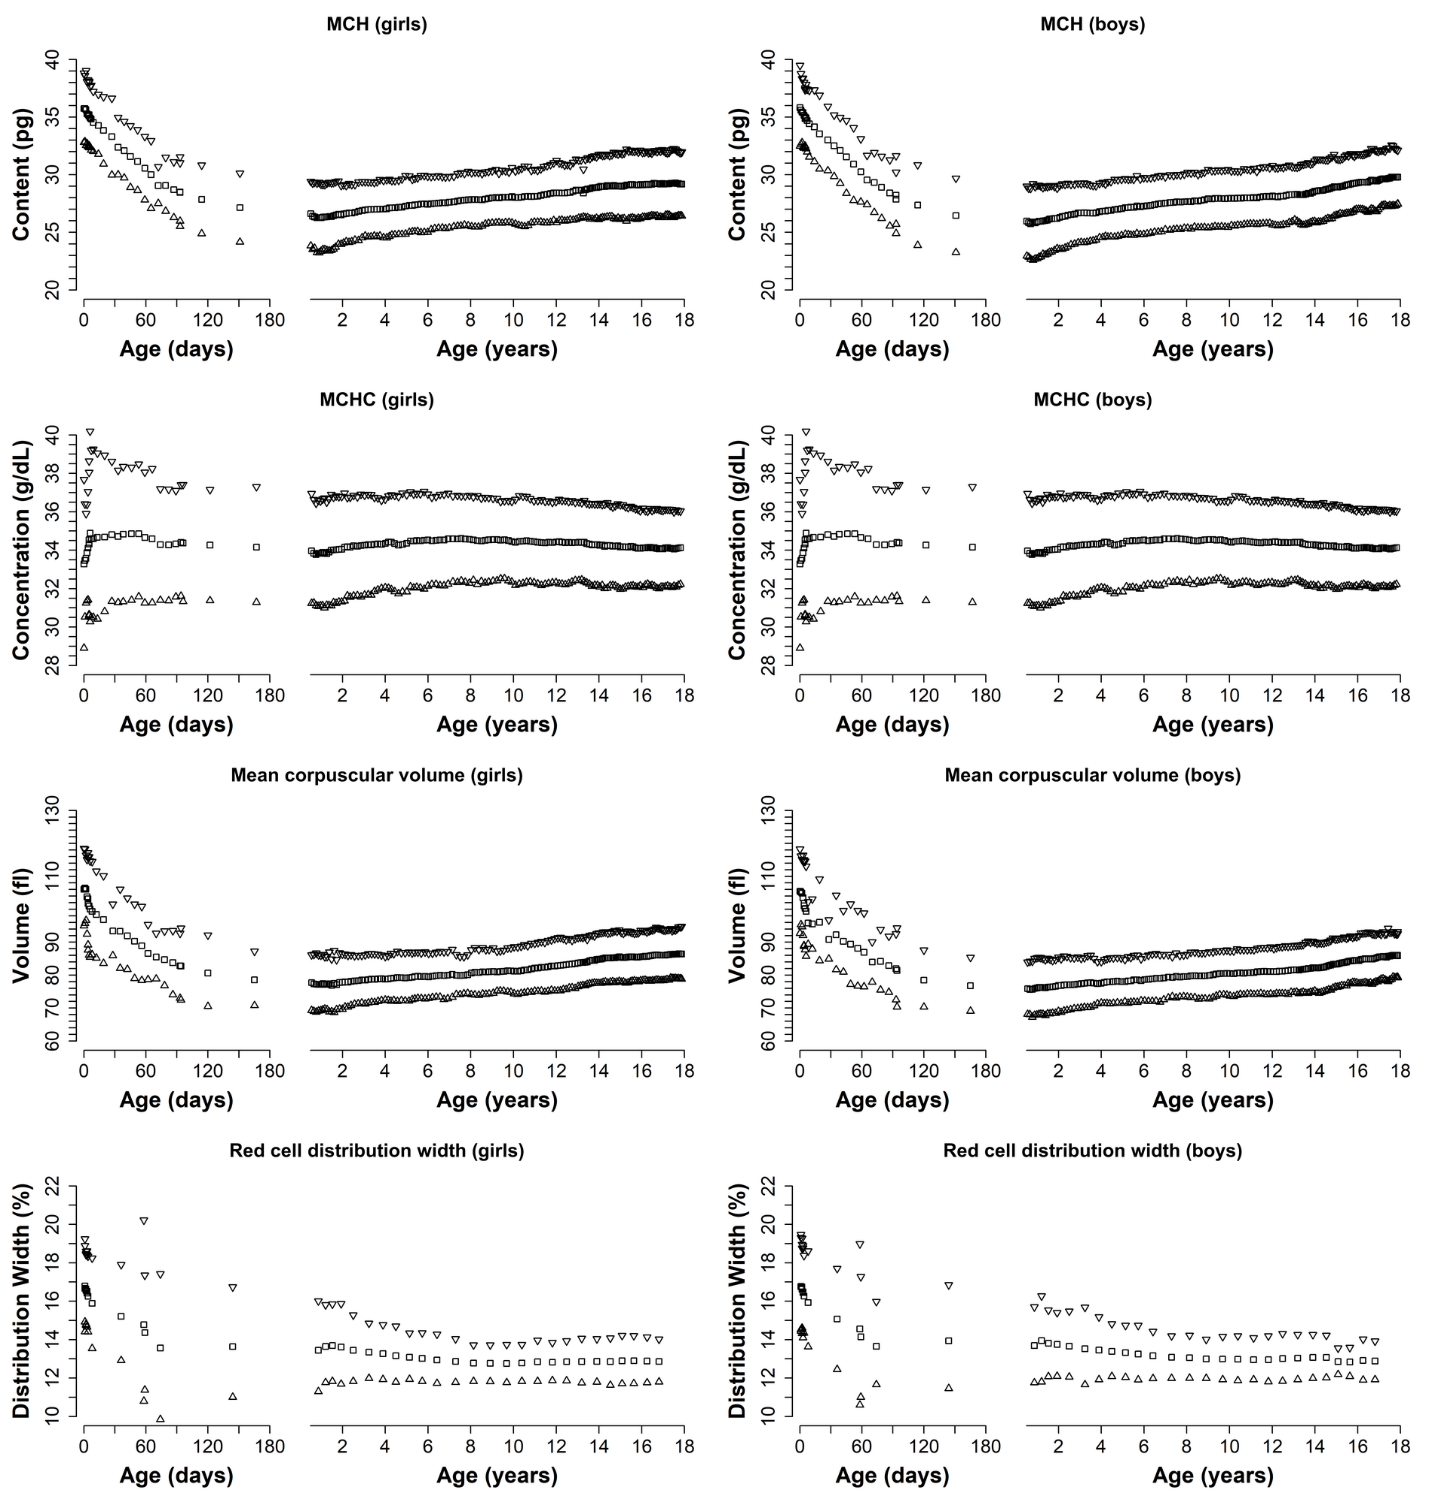
**

**
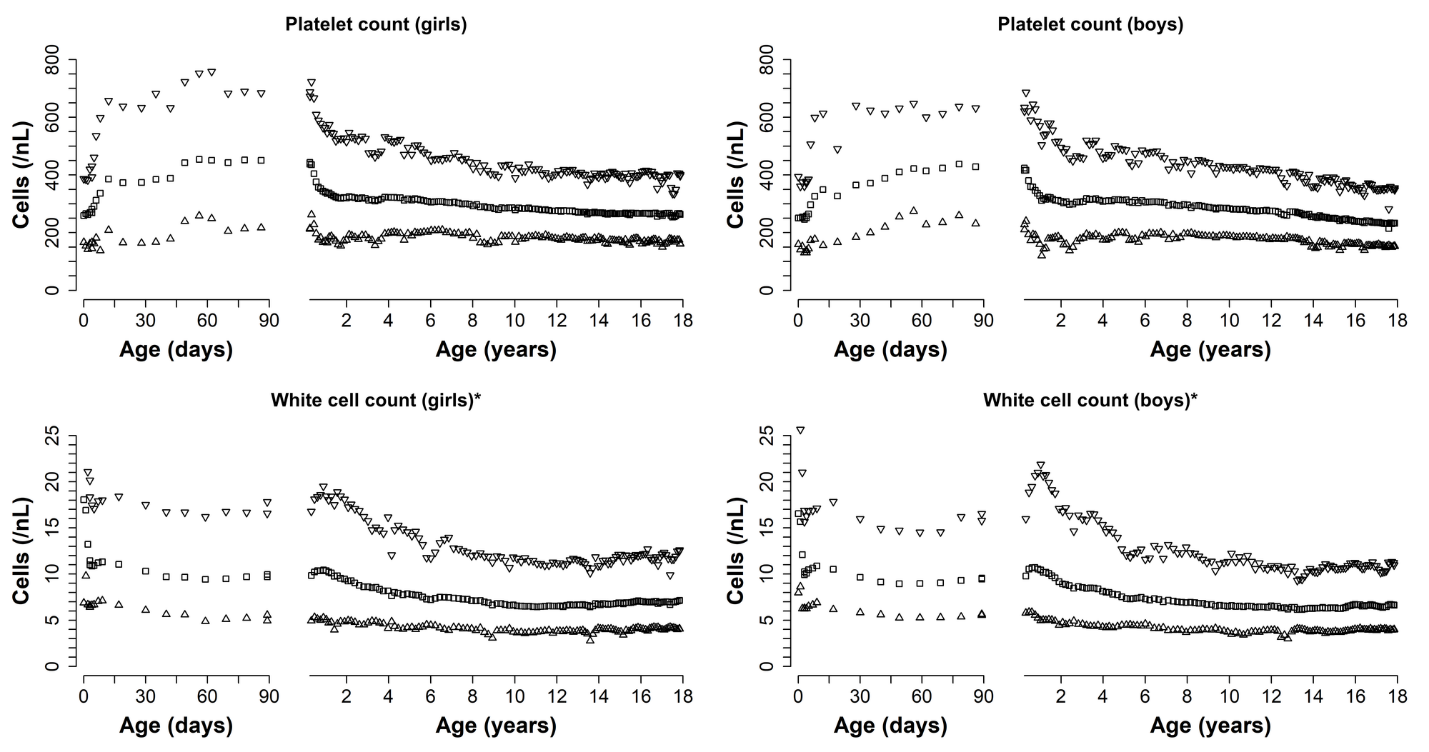
**
