# Supplementary material for: Next-generation reference intervals for pediatric hematology
Source: publisher site journal article supplement (doi:10.1515/cclm-2018-1236), 2019-04-21
Supplement: Supplementary file 5 [file Supplemental Table 2.docx]

**Supplemental Table 2**

The following tables show center-specific median values for all examined analytes to demonstrate analytical stability of measurements over time. Quarterly median values from all children are shown, Teil-Senn regression and SD calculation are performed on the quarterly median values (for quarters with ≥ 100 measurements). The 95 % confidence intervals for slope are shown and marked with an asterisk if not overlapping zero, indicating a significant trend over time. While this shows significant trends during the study period in red cell distribution width and red cell count, we deemed the magnitude of these trends not clinically relevant in relation to guidelines for laboratory quality control (20, 21) and the range of existing and established reference intervals. Comparison values from the *Guideline of the German Medical Association on Quality Assurance in Medical Laboratory Examinations* (“Permissible relative deviation in external quality assurance “ from the “Rili-BAEK”) (20,21) are provided. No median values are shown if ≤ 100 samples were measured in a quarter (also marked with an asterisk).

x̃ denotes median value. Abbreviations: N/A, not available.

Center-specific median values for Hemoglobin over time

| **Period** | **A** | | **B** | | **C** | | **D** | | **E** | | **F** | | **G** | | **H** | | **I** | | **J** | | **All** | |
| --- | --- | --- | --- | --- | --- | --- | --- | --- | --- | --- | --- | --- | --- | --- | --- | --- | --- | --- | --- | --- | --- | --- |
| **n** | **x̃** | **n** | **x̃** | **n** | **x̃** | **n** | **x̃** | **n** | **x̃** | **n** | **x̃** | **n** | **x̃** | **n** | **x̃** | **n** | **x̃** | **n** | **x̃** | **n** | **x̃** |
| Q1/08 | 20 | * | N/A | N/A | N/A | N/A | 5852 | 12.3 | N/A | N/A | 4735 | 12.1 | N/A | N/A | N/A | N/A | N/A | N/A | 944 | 12.7 | 11551 | 12.3 |
| Q2/08 | 6192 | 12.3 | N/A | N/A | N/A | N/A | 5116 | 12.3 | N/A | N/A | 4686 | 12.1 | N/A | N/A | N/A | N/A | N/A | N/A | 928 | 12.4 | 16922 | 12.3 |
| Q3/08 | 5514 | 12.2 | N/A | N/A | N/A | N/A | 4854 | 12.3 | N/A | N/A | 4588 | 12.0 | N/A | N/A | 191 | 12.7 | N/A | N/A | 714 | 12.5 | 15861 | 12.2 |
| Q4/08 | 5389 | 12.3 | N/A | N/A | N/A | N/A | 4702 | 12.4 | N/A | N/A | 4886 | 12.1 | N/A | N/A | 1451 | 13.3 | N/A | N/A | 738 | 12.5 | 17166 | 12.4 |
| Q1/09 | 5665 | 12.2 | N/A | N/A | N/A | N/A | 5261 | 12.5 | N/A | N/A | 4984 | 12.0 | N/A | N/A | 1783 | 13.1 | N/A | N/A | 850 | 12.4 | 18543 | 12.4 |
| Q2/09 | 5484 | 12.1 | N/A | N/A | N/A | N/A | 4771 | 12.5 | N/A | N/A | 4759 | 12.0 | N/A | N/A | 1575 | 13.1 | N/A | N/A | 687 | 12.4 | 17276 | 12.3 |
| Q3/09 | 5575 | 12.1 | N/A | N/A | N/A | N/A | 4901 | 12.5 | N/A | N/A | 5101 | 11.9 | N/A | N/A | 1575 | 13.2 | N/A | N/A | 760 | 12.5 | 17912 | 12.3 |
| Q4/09 | 5773 | 12.2 | N/A | N/A | 26 | * | 4729 | 12.6 | N/A | N/A | 5188 | 11.9 | N/A | N/A | 1552 | 13.2 | N/A | N/A | 801 | 12.7 | 18069 | 12.4 |
| Q1/10 | 5697 | 12.4 | 5099 | 12.1 | 4468 | 11.5 | 4874 | 12.7 | N/A | N/A | 5049 | 12.0 | N/A | N/A | 1824 | 13.2 | N/A | N/A | 770 | 12.6 | 27781 | 12.3 |
| Q2/10 | 5517 | 12.2 | 4998 | 11.9 | 4528 | 11.5 | 4317 | 12.5 | N/A | N/A | 4767 | 11.9 | N/A | N/A | 1748 | 13.1 | N/A | N/A | 752 | 12.6 | 26627 | 12.1 |
| Q3/10 | 5799 | 12.2 | 5227 | 12.0 | 4776 | 11.3 | 4662 | 12.4 | N/A | N/A | 4668 | 11.8 | N/A | N/A | 1583 | 13.0 | N/A | N/A | 681 | 12.6 | 27396 | 12.1 |
| Q4/10 | 5884 | 12.3 | 5278 | 12.0 | 3929 | 11.6 | 4538 | 12.5 | N/A | N/A | 5098 | 11.7 | N/A | N/A | 1599 | 13.1 | N/A | N/A | 794 | 12.8 | 27120 | 12.2 |
| Q1/11 | 6219 | 12.5 | 5352 | 12.1 | 4348 | 11.4 | 4867 | 12.4 | N/A | N/A | 5237 | 11.8 | N/A | N/A | 1894 | 13.0 | N/A | N/A | 831 | 12.7 | 28748 | 12.2 |
| Q2/11 | 5120 | 12.2 | 5389 | 12.0 | 4301 | 11.3 | 4576 | 12.3 | N/A | N/A | 5545 | 11.6 | N/A | N/A | 1613 | 13.0 | N/A | N/A | 815 | 12.6 | 27359 | 12.0 |
| Q3/11 | 5860 | 12.2 | 5836 | 12.0 | 4591 | 11.0 | 4228 | 12.4 | N/A | N/A | 5246 | 11.7 | N/A | N/A | 1435 | 13.0 | N/A | N/A | 739 | 12.5 | 27935 | 12.0 |
| Q4/11 | 5775 | 12.3 | 5735 | 11.9 | 5084 | 11.1 | 4157 | 12.3 | 3708 | 13.4 | 5557 | 11.6 | N/A | N/A | 1546 | 13.2 | N/A | N/A | 743 | 12.6 | 32305 | 12.2 |
| Q1/12 | 6111 | 12.2 | 6324 | 12.1 | 5338 | 11.0 | 4951 | 12.3 | 6040 | 13.4 | 5489 | 11.9 | N/A | N/A | 1783 | 13.1 | N/A | N/A | 725 | 12.5 | 36761 | 12.4 |
| Q2/12 | 5486 | 12.2 | 5916 | 12.0 | 4809 | 11.0 | 4305 | 12.3 | 5547 | 13.2 | 5518 | 11.9 | N/A | N/A | 1571 | 13.1 | N/A | N/A | 752 | 12.7 | 33904 | 12.3 |
| Q3/12 | 5581 | 12.2 | 6107 | 11.9 | 4737 | 11.1 | 4312 | 12.5 | 5088 | 13.2 | 5121 | 12.0 | N/A | N/A | 1406 | 13.1 | 2 | * | 659 | 12.7 | 33013 | 12.3 |
| Q4/12 | 5572 | 12.4 | 5406 | 12.1 | 4675 | 11.1 | 4315 | 12.6 | 5808 | 13.3 | 4927 | 12.0 | N/A | N/A | 1487 | 13.2 | 125 | 13.3 | 730 | 12.7 | 33045 | 12.5 |
| Q1/13 | 6142 | 12.2 | 5756 | 12.4 | 4989 | 11.0 | 5184 | 12.3 | 5891 | 13.3 | 5424 | 11.9 | N/A | N/A | 1709 | 13.2 | 415 | 12.7 | 731 | 12.7 | 36241 | 12.4 |
| Q2/13 | 5734 | 12.0 | 5372 | 12.5 | 4939 | 10.8 | 4955 | 12.1 | 5966 | 13.2 | 4881 | 12.0 | N/A | N/A | 1769 | 13.0 | 506 | 12.9 | 667 | 12.5 | 34789 | 12.4 |
| Q3/13 | 6979 | 12.0 | 5433 | 12.4 | 4996 | 10.9 | 4634 | 12.1 | 5235 | 13.3 | 5108 | 11.8 | N/A | N/A | 1554 | 13.1 | 587 | 12.8 | 700 | 12.5 | 35226 | 12.3 |
| Q4/13 | 6355 | 12.3 | 5271 | 12.4 | 4773 | 11.3 | 4516 | 12.3 | 5848 | 13.3 | 4840 | 11.7 | N/A | N/A | 1589 | 13.1 | 497 | 13.2 | 608 | 12.6 | 34297 | 12.5 |
| Q1/14 | 6448 | 12.4 | 5701 | 12.4 | 5149 | 11.2 | 4903 | 12.4 | 6806 | 13.2 | 5136 | 11.8 | N/A | N/A | 1757 | 13.1 | 749 | 12.9 | 681 | 12.6 | 37330 | 12.5 |
| Q2/14 | 6228 | 12.3 | 5536 | 12.3 | 4969 | 11.2 | 4422 | 12.3 | 6279 | 13.2 | 5101 | 11.8 | 3 | * | 1728 | 13.1 | 1735 | 12.7 | 647 | 12.5 | 36648 | 12.4 |
| Q3/14 | 6182 | 12.2 | 5670 | 12.3 | 5148 | 11.2 | 4147 | 12.4 | 5694 | 13.3 | 4955 | 12.0 | 4767 | 11.6 | 1714 | 13.0 | 1599 | 12.9 | 634 | 12.5 | 40510 | 12.4 |
| Q4/14 | 6551 | 12.0 | 5578 | 12.3 | 5029 | 11.4 | 4463 | 12.4 | 5932 | 13.3 | 5361 | 11.6 | 4823 | 11.6 | 1623 | 13.2 | 5400 | 12.5 | 692 | 12.5 | 45452 | 12.3 |
| Q1/15 | 7407 | 12.1 | 5713 | 12.3 | 5206 | 11.1 | 4824 | 12.4 | 6654 | 13.3 | 5397 | 11.8 | 4707 | 11.5 | 1918 | 13.1 | 6056 | 12.4 | 767 | 12.4 | 48649 | 12.3 |
| Q2/15 | 6511 | 12.2 | 5578 | 12.2 | 5485 | 10.9 | 4283 | 12.3 | 6154 | 13.2 | 5362 | 11.8 | 5105 | 11.5 | 2511 | 13.0 | 5675 | 12.6 | 643 | 13.0 | 47307 | 12.3 |
| Q3/15 | 7070 | 12.0 | N/A | N/A | N/A | N/A | N/A | N/A | 1 | * | 5657 | 11.5 | 4928 | 11.7 | 2426 | 13.0 | 6542 | 12.5 | 641 | 13.0 | 27265 | 12.2 |
| Q4/15 | 7137 | 12.0 | N/A | N/A | N/A | N/A | N/A | N/A | N/A | N/A | 5780 | 11.4 | 4345 | 12.0 | 2500 | 13.1 | 7135 | 12.4 | 695 | 12.9 | 27592 | 12.2 |
| Q1/16 | 8185 | 11.9 | N/A | N/A | N/A | N/A | N/A | N/A | N/A | N/A | N/A | N/A | 4936 | 11.8 | 2836 | 13.1 | 6957 | 12.4 | 754 | 12.9 | 23668 | 12.3 |
| Q2/16 | 7168 | 12.1 | N/A | N/A | N/A | N/A | N/A | N/A | N/A | N/A | N/A | N/A | 4597 | 11.8 | 2799 | 13.0 | 7021 | 12.4 | 669 | 12.7 | 22254 | 12.3 |
| Q3/16 | 7323 | 12.0 | N/A | N/A | N/A | N/A | N/A | N/A | N/A | N/A | N/A | N/A | N/A | N/A | 2417 | 13.0 | 6486 | 12.5 | 620 | 13.0 | 16846 | 12.4 |
| Q4/16 | 7079 | 12.0 | N/A | N/A | N/A | N/A | N/A | N/A | N/A | N/A | N/A | N/A | N/A | N/A | 1182 | 13.2 | 7025 | 12.5 | 699 | 12.8 | 15985 | 12.4 |
| Theil-Sen CI | -0.01–0.00 | | 0.00–0.03 | | -0.04–0.00 | | -0.01–0.00 | | -0.01–0.00 | | -0.02–-0.01* | | -0.03–0.10 | | -0.00–0.00 | | -0.07–0.00 | | 0.00–0.01 | | 0.00–0.01 | |
| SD (%) | 1.1 | | 1.5 | | 1.9 | | 1.1 | | 0.5 | | 1.5 | | 1.4 | | 0.8 | | 2.2 | | 1.3 | | 1.0 | |

(Permissible relative deviation in external quality assurance is 6.0 %.)

Center-specific median values for Hematocrit over time

| Period | A | | B | | C | | D | | E | | F | | G | | H | | I | | J | | All | |
| --- | --- | --- | --- | --- | --- | --- | --- | --- | --- | --- | --- | --- | --- | --- | --- | --- | --- | --- | --- | --- | --- | --- |
| n | x̃ | n | x̃ | n | x̃ | n | x̃ | n | x̃ | n | **x̃** | **n** | **x̃** | **n** | **x̃** | **n** | **x̃** | **n** | **x̃** | **n** | **x̃** |
| Q1/08 | 20 | * | N/A | N/A | N/A | N/A | 5852 | 36.0 | N/A | N/A | N/A | N/A | N/A | N/A | N/A | N/A | N/A | N/A | 941 | 36.4 | 6813 | 36.0 |
| Q2/08 | 6192 | 36.9 | N/A | N/A | N/A | N/A | 5116 | 36.5 | N/A | N/A | N/A | N/A | N/A | N/A | N/A | N/A | N/A | N/A | 932 | 36.0 | 12240 | 36.6 |
| Q3/08 | 5514 | 36.4 | N/A | N/A | N/A | N/A | 4854 | 36.2 | N/A | N/A | N/A | N/A | N/A | N/A | 190 | 38.7 | N/A | N/A | 714 | 36.6 | 11272 | 36.4 |
| Q4/08 | 5389 | 37.1 | N/A | N/A | N/A | N/A | 4702 | 36.6 | N/A | N/A | N/A | N/A | N/A | N/A | 1444 | 39.8 | N/A | N/A | 738 | 36.5 | 12273 | 37.2 |
| Q1/09 | 5665 | 37.0 | N/A | N/A | N/A | N/A | 5261 | 36.8 | N/A | N/A | N/A | N/A | N/A | N/A | 1772 | 39.4 | N/A | N/A | 852 | 36.1 | 13550 | 37.3 |
| Q2/09 | 5484 | 36.4 | N/A | N/A | N/A | N/A | 4771 | 37.0 | N/A | N/A | N/A | N/A | N/A | N/A | 1570 | 39.6 | N/A | N/A | 691 | 36.3 | 12516 | 37.2 |
| Q3/09 | 5575 | 36.3 | N/A | N/A | N/A | N/A | 4901 | 36.7 | N/A | N/A | N/A | N/A | N/A | N/A | 1567 | 40.2 | N/A | N/A | 760 | 37.0 | 12803 | 37.0 |
| Q4/09 | 5774 | 36.8 | N/A | N/A | 26 | * | 4730 | 37.6 | N/A | N/A | N/A | N/A | N/A | N/A | 1546 | 40.1 | N/A | N/A | 802 | 37.1 | 12878 | 37.6 |
| Q1/10 | 5697 | 37.5 | 5099 | 35.9 | 4468 | 34.1 | 4868 | 37.3 | N/A | N/A | N/A | N/A | N/A | N/A | 1818 | 39.9 | N/A | N/A | 770 | 36.5 | 22720 | 36.7 |
| Q2/10 | 5517 | 36.7 | 4998 | 35.4 | 4528 | 33.9 | 4317 | 36.8 | N/A | N/A | N/A | N/A | N/A | N/A | 1747 | 39.8 | N/A | N/A | 752 | 36.9 | 21859 | 36.2 |
| Q3/10 | 5799 | 36.6 | 5227 | 35.5 | 4776 | 33.3 | 4662 | 36.6 | N/A | N/A | N/A | N/A | N/A | N/A | 1578 | 39.8 | N/A | N/A | 679 | 36.8 | 22721 | 36.0 |
| Q4/10 | 5884 | 37.4 | 5278 | 35.1 | 3929 | 34.7 | 4538 | 36.7 | N/A | N/A | N/A | N/A | N/A | N/A | 1594 | 39.9 | N/A | N/A | 792 | 37.2 | 22015 | 36.4 |
| Q1/11 | 6220 | 37.6 | 5352 | 36.0 | 4348 | 34.0 | 4868 | 37.2 | N/A | N/A | N/A | N/A | N/A | N/A | 1880 | 39.6 | N/A | N/A | 832 | 37.3 | 23500 | 36.7 |
| Q2/11 | 5120 | 37.0 | 5389 | 35.7 | 4301 | 33.2 | 4576 | 36.9 | N/A | N/A | N/A | N/A | N/A | N/A | 1610 | 39.5 | N/A | N/A | 815 | 37.4 | 21811 | 36.2 |
| Q3/11 | 5859 | 36.8 | 5836 | 34.8 | 4590 | 32.3 | 4228 | 37.3 | N/A | N/A | N/A | N/A | N/A | N/A | 1432 | 39.4 | N/A | N/A | 740 | 36.7 | 22685 | 35.8 |
| Q4/11 | 5775 | 37.3 | 5734 | 35.4 | 5051 | 32.9 | 4157 | 36.2 | 21 | * | N/A | N/A | N/A | N/A | 1543 | 39.7 | N/A | N/A | 743 | 36.6 | 23024 | 35.9 |
| Q1/12 | 6111 | 37.2 | 6324 | 36.6 | 5337 | 33.0 | 4951 | 36.6 | 6086 | 38.7 | N/A | N/A | N/A | N/A | 1780 | 39.6 | N/A | N/A | 726 | 36.4 | 31315 | 37.0 |
| Q2/12 | 5486 | 37.0 | 5916 | 36.1 | 4809 | 32.9 | 4305 | 36.5 | 5614 | 38.6 | N/A | N/A | N/A | N/A | 1569 | 39.5 | N/A | N/A | 753 | 37.2 | 28452 | 36.8 |
| Q3/12 | 5581 | 37.0 | 6107 | 36.0 | 4737 | 32.9 | 4312 | 36.7 | 5132 | 38.5 | N/A | N/A | N/A | N/A | 1405 | 39.3 | 2 | * | 659 | 37.6 | 27935 | 36.8 |
| Q4/12 | 5572 | 38.2 | 5406 | 36.5 | 4674 | 33.0 | 4315 | 37.0 | 5864 | 38.6 | N/A | N/A | N/A | N/A | 1484 | 39.6 | 125 | 39.0 | 729 | 37.4 | 28169 | 37.3 |
| Q1/13 | 6143 | 37.4 | 5756 | 36.5 | 4988 | 33.0 | 5184 | 37.0 | 5954 | 38.5 | N/A | N/A | N/A | N/A | 1706 | 39.8 | 415 | 37.7 | 731 | 37.5 | 30877 | 37.1 |
| Q2/13 | 5734 | 36.1 | 5372 | 36.5 | 4939 | 32.6 | 4955 | 36.9 | 6043 | 38.0 | N/A | N/A | N/A | N/A | 1766 | 39.2 | 506 | 38.6 | 665 | 37.5 | 29980 | 36.7 |
| Q3/13 | 6979 | 35.6 | 5433 | 37.0 | 4996 | 32.2 | 4634 | 36.4 | 5310 | 38.1 | N/A | N/A | N/A | N/A | 1549 | 40.1 | 587 | 37.8 | 701 | 37.2 | 30189 | 36.6 |
| Q4/13 | 6355 | 36.4 | 5271 | 36.8 | 4773 | 32.9 | 4516 | 36.4 | 5914 | 38.2 | N/A | N/A | N/A | N/A | 1588 | 39.9 | 497 | 39.0 | 608 | 37.5 | 29522 | 36.9 |
| Q1/14 | 6448 | 37.2 | 5701 | 36.6 | 5147 | 33.3 | 4903 | 36.2 | 6892 | 38.2 | N/A | N/A | N/A | N/A | 1756 | 39.2 | 749 | 37.7 | 681 | 37.4 | 32277 | 37.0 |
| Q2/14 | 6227 | 36.6 | 5536 | 36.5 | 4967 | 33.5 | 4422 | 35.8 | 6361 | 38.1 | N/A | N/A | 3 | * | 1729 | 39.1 | 1735 | 37.1 | 647 | 37.1 | 31627 | 36.7 |
| Q3/14 | 6182 | 36.1 | 5670 | 37.1 | 5148 | 33.2 | 4147 | 36.1 | 5755 | 38.4 | N/A | N/A | 4767 | 34.1 | 1714 | 39.6 | 1599 | 37.6 | 633 | 37.9 | 35615 | 36.5 |
| Q4/14 | 6552 | 35.6 | 5578 | 37.0 | 5028 | 33.7 | 4463 | 36.3 | 5993 | 38.5 | N/A | N/A | 4823 | 34.2 | 1623 | 39.7 | 5400 | 36.3 | 692 | 37.7 | 40152 | 36.5 |
| Q1/15 | 7407 | 35.9 | 5713 | 36.8 | 5205 | 32.8 | 4824 | 36.4 | 6714 | 38.4 | N/A | N/A | 4707 | 33.5 | 1918 | 39.6 | 6055 | 35.8 | 767 | 37.3 | 43310 | 36.4 |
| Q2/15 | 6511 | 35.9 | 5577 | 36.4 | 5485 | 32.4 | 4283 | 36.1 | 6228 | 38.6 | N/A | N/A | 5105 | 33.9 | 2511 | 39.0 | 5675 | 36.3 | 644 | 38.8 | 42019 | 36.3 |
| Q3/15 | 7070 | 35.3 | N/A | N/A | N/A | N/A | N/A | N/A | 1 | * | N/A | N/A | 4928 | 34.2 | 2426 | 38.9 | 6542 | 36.1 | 643 | 38.6 | 21610 | 35.9 |
| Q4/15 | 7137 | 35.6 | N/A | N/A | N/A | N/A | N/A | N/A | N/A | N/A | N/A | N/A | 4345 | 35.0 | 2500 | 39.0 | 7135 | 36.1 | 695 | 38.6 | 21812 | 36.3 |
| Q1/16 | 8185 | 35.5 | N/A | N/A | N/A | N/A | N/A | N/A | N/A | N/A | N/A | N/A | 4936 | 34.4 | 2836 | 39.2 | 6958 | 36.1 | 754 | 38.1 | 23669 | 36.2 |
| Q2/16 | 7168 | 35.8 | N/A | N/A | N/A | N/A | N/A | N/A | N/A | N/A | N/A | N/A | 4597 | 34.4 | 2799 | 38.6 | 7021 | 36.0 | 669 | 37.4 | 22254 | 36.2 |
| Q3/16 | 7323 | 36.3 | N/A | N/A | N/A | N/A | N/A | N/A | N/A | N/A | N/A | N/A | N/A | N/A | 2417 | 38.5 | 6486 | 36.3 | 621 | 38.6 | 16847 | 36.8 |
| Q4/16 | 7079 | 37.1 | N/A | N/A | N/A | N/A | N/A | N/A | N/A | N/A | N/A | N/A | N/A | N/A | 1182 | 38.9 | 7026 | 36.2 | 701 | 37.8 | 15988 | 36.9 |
| Theil-Sen CI | -0.06–-0.01* | | 0.05–0.10* | | -0.08–0.00 | | -0.04–0.00 | | -0.06–0.05 | |  | | -0.07–0.30 | | -0.04–-0.02* | | -0.20–0.00 | | 0.04–0.07* | | -0.03–0.01 | |
| SD (%) | 1.9 | | 1.8 | | 1.8 | | 1.1 | | 0.6 | |  | | 1.2 | | 1.1 | | 2.9 | | 1.9 | | 1.2 | |

(Permissible relative deviation in external quality assurance is 9.0 %.)

Center-specific median values for Red cell count over time

| Period | A | | B | | C | | D | | E | | F | | G | | H | | I | | J | | All | |
| --- | --- | --- | --- | --- | --- | --- | --- | --- | --- | --- | --- | --- | --- | --- | --- | --- | --- | --- | --- | --- | --- | --- |
| n | x̃ | n | x̃ | n | x̃ | n | x̃ | n | x̃ | n | **x̃** | **n** | **x̃** | **n** | **x̃** | **n** | **x̃** | **n** | **x̃** | **n** | **x̃** |
| Q1/08 | 20 | * | N/A | N/A | N/A | N/A | 5852 | 4.31 | N/A | N/A | 494 | 4.31 | N/A | N/A | N/A | N/A | N/A | N/A | 944 | 4.50 | 7310 | 4.34 |
| Q2/08 | 6192 | 4.37 | N/A | N/A | N/A | N/A | 5116 | 4.35 | N/A | N/A | 323 | 4.36 | N/A | N/A | N/A | N/A | N/A | N/A | 932 | 4.42 | 12563 | 4.37 |
| Q3/08 | 5514 | 4.37 | N/A | N/A | N/A | N/A | 4854 | 4.30 | N/A | N/A | 251 | 4.28 | N/A | N/A | 190 | 4.58 | N/A | N/A | 714 | 4.48 | 11523 | 4.35 |
| Q4/08 | 5389 | 4.41 | N/A | N/A | N/A | N/A | 4702 | 4.36 | N/A | N/A | 433 | 4.33 | N/A | N/A | 1444 | 4.70 | N/A | N/A | 739 | 4.50 | 12707 | 4.44 |
| Q1/09 | 5665 | 4.40 | N/A | N/A | N/A | N/A | 5261 | 4.39 | N/A | N/A | 635 | 4.36 | N/A | N/A | 1772 | 4.72 | N/A | N/A | 853 | 4.46 | 14186 | 4.46 |
| Q2/09 | 5484 | 4.35 | N/A | N/A | N/A | N/A | 4771 | 4.38 | N/A | N/A | 1437 | 4.50 | N/A | N/A | 1570 | 4.69 | N/A | N/A | 690 | 4.48 | 13952 | 4.44 |
| Q3/09 | 5575 | 4.40 | N/A | N/A | N/A | N/A | 4901 | 4.32 | N/A | N/A | 1415 | 4.47 | N/A | N/A | 1567 | 4.70 | N/A | N/A | 760 | 4.46 | 14218 | 4.43 |
| Q4/09 | 5774 | 4.39 | N/A | N/A | 26 | * | 4728 | 4.38 | N/A | N/A | 1504 | 4.38 | N/A | N/A | 1546 | 4.73 | N/A | N/A | 802 | 4.47 | 14380 | 4.44 |
| Q1/10 | 5697 | 4.46 | 5099 | 4.41 | 4468 | 4.20 | 4874 | 4.40 | N/A | N/A | 1253 | 4.50 | N/A | N/A | 1818 | 4.78 | N/A | N/A | 771 | 4.46 | 23980 | 4.43 |
| Q2/10 | 5517 | 4.39 | 4998 | 4.36 | 4528 | 4.20 | 4317 | 4.35 | N/A | N/A | 1268 | 4.44 | N/A | N/A | 1747 | 4.75 | N/A | N/A | 752 | 4.46 | 23127 | 4.40 |
| Q3/10 | 5799 | 4.36 | 5227 | 4.35 | 4776 | 4.00 | 4662 | 4.25 | N/A | N/A | 1369 | 4.41 | N/A | N/A | 1578 | 4.72 | N/A | N/A | 681 | 4.36 | 24092 | 4.32 |
| Q4/10 | 5884 | 4.43 | 5278 | 4.29 | 3929 | 4.20 | 4538 | 4.28 | N/A | N/A | 1520 | 4.34 | N/A | N/A | 1594 | 4.77 | N/A | N/A | 794 | 4.40 | 23537 | 4.37 |
| Q1/11 | 6220 | 4.51 | 5352 | 4.33 | 4348 | 4.10 | 4868 | 4.36 | N/A | N/A | 1442 | 4.43 | N/A | N/A | 1883 | 4.76 | N/A | N/A | 832 | 4.39 | 24945 | 4.40 |
| Q2/11 | 5120 | 4.41 | 5389 | 4.26 | 4301 | 4.10 | 4576 | 4.32 | N/A | N/A | 1366 | 4.34 | N/A | N/A | 1614 | 4.72 | N/A | N/A | 817 | 4.42 | 23183 | 4.34 |
| Q3/11 | 5859 | 4.38 | 5836 | 4.23 | 4591 | 3.90 | 4228 | 4.30 | N/A | N/A | 1403 | 4.43 | N/A | N/A | 1435 | 4.69 | N/A | N/A | 740 | 4.41 | 24092 | 4.30 |
| Q4/11 | 5775 | 4.45 | 5735 | 4.23 | 5051 | 3.90 | 4157 | 4.24 | 3708 | 4.72 | 1458 | 4.32 | N/A | N/A | 1544 | 4.74 | N/A | N/A | 743 | 4.37 | 28171 | 4.40 |
| Q1/12 | 6111 | 4.45 | 6324 | 4.36 | 5337 | 4.00 | 4950 | 4.29 | 6040 | 4.71 | 1676 | 4.34 | N/A | N/A | 1781 | 4.74 | N/A | N/A | 726 | 4.37 | 32945 | 4.45 |
| Q2/12 | 5486 | 4.41 | 5916 | 4.29 | 4810 | 4.00 | 4305 | 4.27 | 5547 | 4.72 | 1386 | 4.45 | N/A | N/A | 1569 | 4.72 | N/A | N/A | 753 | 4.38 | 29772 | 4.44 |
| Q3/12 | 5581 | 4.44 | 6107 | 4.27 | 4738 | 4.00 | 4312 | 4.27 | 5088 | 4.71 | 1448 | 4.38 | N/A | N/A | 1408 | 4.69 | 2 | * | 659 | 4.43 | 29343 | 4.43 |
| Q4/12 | 5572 | 4.47 | 5406 | 4.36 | 4675 | 4.00 | 4312 | 4.33 | 5808 | 4.73 | 1384 | 4.32 | N/A | N/A | 1486 | 4.75 | 125 | 4.74 | 730 | 4.43 | 29498 | 4.49 |
| Q1/13 | 6142 | 4.45 | 5756 | 4.42 | 4988 | 4.00 | 5183 | 4.32 | 5891 | 4.73 | 1426 | 4.30 | N/A | N/A | 1709 | 4.76 | 415 | 4.68 | 731 | 4.55 | 32241 | 4.49 |
| Q2/13 | 5733 | 4.28 | 5372 | 4.38 | 4939 | 4.00 | 4955 | 4.30 | 5966 | 4.69 | 1345 | 4.41 | N/A | N/A | 1770 | 4.65 | 506 | 4.66 | 665 | 4.52 | 31251 | 4.44 |
| Q3/13 | 6979 | 4.25 | 5433 | 4.40 | 4996 | 3.90 | 4634 | 4.28 | 5235 | 4.70 | 1294 | 4.48 | N/A | N/A | 1554 | 4.68 | 805 | 4.58 | 701 | 4.45 | 31631 | 4.43 |
| Q4/13 | 6355 | 4.37 | 5271 | 4.43 | 4773 | 4.00 | 4516 | 4.34 | 5848 | 4.72 | 1380 | 4.21 | N/A | N/A | 1592 | 4.69 | 883 | 4.66 | 608 | 4.54 | 31226 | 4.48 |
| Q1/14 | 6448 | 4.43 | 5701 | 4.42 | 5147 | 4.10 | 4903 | 4.40 | 6806 | 4.71 | 1529 | 4.30 | N/A | N/A | 1761 | 4.72 | 1121 | 4.61 | 681 | 4.59 | 34097 | 4.50 |
| Q2/14 | 6228 | 4.41 | 5536 | 4.38 | 4970 | 4.10 | 4422 | 4.36 | 6279 | 4.69 | 1651 | 4.23 | 3 | * | 1733 | 4.69 | 2137 | 4.56 | 647 | 4.57 | 33606 | 4.48 |
| Q3/14 | 6182 | 4.39 | 5670 | 4.38 | 5206 | 4.00 | 4147 | 4.40 | 5694 | 4.71 | 1484 | 4.35 | 4767 | 4.28 | 1717 | 4.69 | 1975 | 4.55 | 634 | 4.65 | 37476 | 4.45 |
| Q4/14 | 6552 | 4.31 | 5578 | 4.42 | 5085 | 4.10 | 4461 | 4.45 | 5932 | 4.73 | 1554 | 4.15 | 4823 | 4.26 | 1625 | 4.72 | 5751 | 4.47 | 692 | 4.58 | 42053 | 4.46 |
| Q1/15 | 7407 | 4.35 | 5713 | 4.49 | 5236 | 4.00 | 4824 | 4.46 | 6654 | 4.73 | 1653 | 4.27 | 4707 | 4.19 | 1920 | 4.75 | 6430 | 4.47 | 767 | 4.57 | 45311 | 4.47 |
| Q2/15 | 6511 | 4.35 | 5577 | 4.41 | 5519 | 4.00 | 4283 | 4.41 | 6155 | 4.71 | 1642 | 4.14 | 5105 | 4.24 | 2512 | 4.68 | 6022 | 4.51 | 644 | 4.69 | 43970 | 4.46 |
| Q3/15 | 7070 | 4.30 | N/A | N/A | N/A | N/A | N/A | N/A | 1 | * | 1651 | 4.06 | 4928 | 4.31 | 2429 | 4.71 | 6899 | 4.48 | 642 | 4.66 | 23620 | 4.42 |
| Q4/15 | 7137 | 4.33 | N/A | N/A | N/A | N/A | N/A | N/A | N/A | N/A | 1423 | 4.20 | 4345 | 4.40 | 2502 | 4.70 | 7496 | 4.47 | 695 | 4.68 | 23598 | 4.46 |
| Q1/16 | 8185 | 4.29 | N/A | N/A | N/A | N/A | N/A | N/A | N/A | N/A | N/A | N/A | 4936 | 4.31 | 2839 | 4.77 | 7354 | 4.52 | 756 | 4.73 | 24070 | 4.47 |
| Q2/16 | 7168 | 4.31 | N/A | N/A | N/A | N/A | N/A | N/A | N/A | N/A | N/A | N/A | 4597 | 4.32 | 2803 | 4.70 | 7464 | 4.47 | 669 | 4.67 | 22701 | 4.45 |
| Q3/16 | 7323 | 4.39 | N/A | N/A | N/A | N/A | N/A | N/A | N/A | N/A | N/A | N/A | N/A | N/A | 2419 | 4.72 | 6836 | 4.51 | 621 | 4.76 | 17199 | 4.52 |
| Q4/16 | 7079 | 4.44 | N/A | N/A | N/A | N/A | N/A | N/A | N/A | N/A | N/A | N/A | N/A | N/A | 1182 | 4.77 | 7327 | 4.51 | 701 | 4.68 | 16289 | 4.52 |
| Theil-Sen CI | -0.00–0.00 | | 0.00–0.01* | | -0.01–0.00 | | -0.00–0.00 | | -0.00–0.00 | | -0.01–-0.00* | | -0.01–0.05 | | -0.00–0.00 | | -0.01–0.00 | | 0.01–0.01* | | 0.00–0.00* | |
| SD (%) | 1.3 | | 1.6 | | 2.2 | | 1.3 | | 0.3 | | 2.4 | | 1.4 | | 0.8 | | 1.8 | | 2.5 | | 1.2 | |

(Permissible relative deviation in external quality assurance is 8.0 %.)

Center-specific median values for White cell count over time

| Period | A | | B | | C | | D | | E | | F | | G | | H | | I | | J | | All | |
| --- | --- | --- | --- | --- | --- | --- | --- | --- | --- | --- | --- | --- | --- | --- | --- | --- | --- | --- | --- | --- | --- | --- |
| n | x̃ | n | x̃ | n | x̃ | n | x̃ | n | x̃ | n | **x̃** | **n** | **x̃** | **n** | **x̃** | **n** | **x̃** | **n** | **x̃** | **n** | **x̃** |
| Q1/08 | 20 | * | N/A | N/A | N/A | N/A | 5852 | 6.6 | N/A | N/A | 497 | 7.7 | N/A | N/A | N/A | N/A | N/A | N/A | 944 | 9.0 | 7313 | 6.9 |
| Q2/08 | 6192 | 6.9 | N/A | N/A | N/A | N/A | 5116 | 7.0 | N/A | N/A | 328 | 6.9 | N/A | N/A | N/A | N/A | N/A | N/A | 931 | 8.6 | 12567 | 7.1 |
| Q3/08 | 5514 | 6.5 | N/A | N/A | N/A | N/A | 4854 | 6.8 | N/A | N/A | 253 | 6.4 | N/A | N/A | 190 | 7.3 | N/A | N/A | 713 | 8.8 | 11524 | 6.8 |
| Q4/08 | 5389 | 6.8 | N/A | N/A | N/A | N/A | 4701 | 7.3 | N/A | N/A | 438 | 7.2 | N/A | N/A | 1449 | 6.5 | N/A | N/A | 741 | 8.9 | 12718 | 7.0 |
| Q1/09 | 5665 | 6.8 | N/A | N/A | N/A | N/A | 5260 | 7.2 | N/A | N/A | 629 | 7.4 | N/A | N/A | 1775 | 6.6 | N/A | N/A | 853 | 8.5 | 14182 | 7.1 |
| Q2/09 | 5482 | 6.6 | N/A | N/A | N/A | N/A | 4771 | 7.3 | N/A | N/A | 1442 | 6.8 | N/A | N/A | 1575 | 6.8 | N/A | N/A | 690 | 8.7 | 13960 | 7.0 |
| Q3/09 | 5575 | 6.2 | N/A | N/A | N/A | N/A | 4901 | 7.0 | N/A | N/A | 1429 | 6.7 | N/A | N/A | 1575 | 6.6 | N/A | N/A | 760 | 8.6 | 14240 | 6.7 |
| Q4/09 | 5774 | 6.5 | N/A | N/A | 26 | * | 4726 | 7.5 | N/A | N/A | 1555 | 7.3 | N/A | N/A | 1560 | 6.7 | N/A | N/A | 799 | 8.8 | 14440 | 7.0 |
| Q1/10 | 5697 | 6.7 | 5097 | 6.5 | 4468 | 5.9 | 4872 | 7.6 | N/A | N/A | 1250 | 7.1 | N/A | N/A | 1834 | 6.8 | N/A | N/A | 769 | 8.4 | 23987 | 6.8 |
| Q2/10 | 5518 | 6.6 | 4998 | 6.3 | 4528 | 5.8 | 4317 | 7.3 | N/A | N/A | 1267 | 7.0 | N/A | N/A | 1761 | 6.9 | N/A | N/A | 749 | 8.3 | 23138 | 6.7 |
| Q3/10 | 5799 | 6.6 | 5227 | 6.1 | 4776 | 5.3 | 4662 | 6.7 | N/A | N/A | 1374 | 6.5 | N/A | N/A | 1587 | 6.8 | N/A | N/A | 680 | 8.2 | 24105 | 6.4 |
| Q4/10 | 5883 | 6.9 | 5277 | 6.1 | 3929 | 6.0 | 4538 | 6.9 | N/A | N/A | 1519 | 6.7 | N/A | N/A | 1603 | 6.9 | N/A | N/A | 794 | 8.8 | 23543 | 6.7 |
| Q1/11 | 6219 | 6.6 | 5352 | 6.4 | 4349 | 5.9 | 4866 | 6.9 | N/A | N/A | 1457 | 7.0 | N/A | N/A | 1883 | 6.8 | N/A | N/A | 831 | 7.7 | 24957 | 6.6 |
| Q2/11 | 5119 | 6.7 | 5389 | 6.4 | 4301 | 5.1 | 4575 | 6.8 | N/A | N/A | 1374 | 7.2 | N/A | N/A | 1619 | 6.8 | N/A | N/A | 817 | 8.5 | 23194 | 6.5 |
| Q3/11 | 5858 | 6.4 | 5836 | 6.0 | 4591 | 5.1 | 4228 | 6.6 | N/A | N/A | 1410 | 6.8 | N/A | N/A | 1435 | 6.9 | N/A | N/A | 739 | 8.4 | 24097 | 6.3 |
| Q4/11 | 5775 | 6.7 | 5735 | 6.2 | 5086 | 5.7 | 4157 | 7.1 | 3710 | 6.7 | 1459 | 6.9 | N/A | N/A | 1553 | 6.8 | N/A | N/A | 742 | 8.8 | 28217 | 6.6 |
| Q1/12 | 6110 | 6.7 | 6324 | 6.0 | 5340 | 5.3 | 4950 | 6.5 | 6043 | 6.5 | 1679 | 6.8 | N/A | N/A | 1802 | 6.9 | N/A | N/A | 726 | 8.4 | 32974 | 6.4 |
| Q2/12 | 5485 | 6.5 | 5915 | 5.9 | 4810 | 5.5 | 4305 | 6.6 | 5552 | 6.6 | 1390 | 7.0 | N/A | N/A | 1577 | 6.9 | N/A | N/A | 753 | 8.3 | 29787 | 6.4 |
| Q3/12 | 5580 | 6.6 | 6107 | 5.8 | 4738 | 5.1 | 4312 | 6.7 | 5094 | 6.5 | 1455 | 6.6 | N/A | N/A | 1414 | 6.8 | 2 | * | 659 | 8.3 | 29361 | 6.3 |
| Q4/12 | 5574 | 6.8 | 5406 | 6.2 | 4680 | 5.4 | 4314 | 7.2 | 5815 | 6.7 | 1391 | 6.6 | N/A | N/A | 1495 | 7.0 | 125 | 7.8 | 730 | 8.3 | 29530 | 6.6 |
| Q1/13 | 6141 | 6.8 | 5756 | 6.3 | 4989 | 5.1 | 5183 | 7.0 | 5896 | 6.6 | 1442 | 6.6 | N/A | N/A | 1725 | 6.8 | 415 | 8.1 | 733 | 8.3 | 32280 | 6.5 |
| Q2/13 | 5733 | 6.8 | 5372 | 6.6 | 4939 | 5.4 | 4953 | 6.5 | 5978 | 6.6 | 1342 | 7.0 | N/A | N/A | 1783 | 6.9 | 506 | 7.7 | 664 | 8.3 | 31270 | 6.6 |
| Q3/13 | 6979 | 6.3 | 5433 | 6.1 | 4996 | 4.8 | 4634 | 6.5 | 5258 | 6.5 | 1303 | 6.7 | N/A | N/A | 1561 | 7.1 | 805 | 8.1 | 700 | 8.4 | 31669 | 6.4 |
| Q4/13 | 6355 | 7.2 | 5271 | 6.3 | 4774 | 5.4 | 4516 | 6.7 | 5864 | 6.8 | 1389 | 7.0 | N/A | N/A | 1598 | 7.2 | 883 | 8.3 | 608 | 8.8 | 31258 | 6.7 |
| Q1/14 | 6448 | 7.3 | 5701 | 6.4 | 5148 | 5.6 | 4903 | 7.0 | 6815 | 6.8 | 1534 | 6.4 | N/A | N/A | 1770 | 7.0 | 1121 | 8.6 | 681 | 8.4 | 34121 | 6.8 |
| Q2/14 | 6227 | 7.0 | 5537 | 6.4 | 4985 | 5.7 | 4422 | 6.8 | 6285 | 6.8 | 1662 | 6.4 | 3 | * | 1751 | 7.1 | 2137 | 8.4 | 647 | 8.5 | 33656 | 6.8 |
| Q3/14 | 6182 | 6.8 | 5670 | 6.4 | 5254 | 5.6 | 4147 | 6.7 | 5744 | 6.6 | 1476 | 6.4 | 4767 | 7.0 | 1728 | 7.1 | 1975 | 8.4 | 634 | 8.5 | 37577 | 6.7 |
| Q4/14 | 6550 | 7.0 | 5578 | 6.7 | 5090 | 5.9 | 4463 | 7.1 | 5934 | 6.7 | 1559 | 6.2 | 4823 | 7.3 | 1638 | 7.2 | 5751 | 7.0 | 692 | 9.1 | 42078 | 6.8 |
| Q1/15 | 7407 | 6.8 | 5713 | 6.6 | 5240 | 5.4 | 4824 | 6.8 | 6659 | 6.8 | 1662 | 6.3 | 4707 | 7.4 | 1941 | 6.9 | 6429 | 6.8 | 767 | 8.6 | 45349 | 6.7 |
| Q2/15 | 6511 | 6.9 | 5577 | 6.2 | 5522 | 5.6 | 4282 | 7.0 | 6158 | 6.7 | 1653 | 5.9 | 5105 | 7.1 | 2522 | 6.9 | 6022 | 7.0 | 644 | 9.0 | 43996 | 6.7 |
| Q3/15 | 7070 | 6.6 | N/A | N/A | N/A | N/A | N/A | N/A | 1 | * | 1670 | 5.9 | 4928 | 7.6 | 2438 | 7.0 | 6899 | 7.0 | 643 | 8.2 | 23649 | 7.0 |
| Q4/15 | 7137 | 6.9 | N/A | N/A | N/A | N/A | N/A | N/A | N/A | N/A | 1420 | 6.5 | 4345 | 7.4 | 2508 | 7.1 | 7496 | 7.1 | 693 | 8.5 | 23599 | 7.1 |
| Q1/16 | 8184 | 7.0 | N/A | N/A | N/A | N/A | N/A | N/A | N/A | N/A | N/A | N/A | 4936 | 7.2 | 2853 | 7.1 | 7355 | 7.2 | 755 | 8.0 | 24083 | 7.2 |
| Q2/16 | 7168 | 6.8 | N/A | N/A | N/A | N/A | N/A | N/A | N/A | N/A | N/A | N/A | 4597 | 7.4 | 2817 | 7.0 | 7464 | 7.3 | 668 | 8.9 | 22714 | 7.2 |
| Q3/16 | 7322 | 6.5 | N/A | N/A | N/A | N/A | N/A | N/A | N/A | N/A | N/A | N/A | N/A | N/A | 2433 | 6.9 | 6836 | 7.3 | 621 | 8.2 | 17212 | 7.0 |
| Q4/16 | 7078 | 6.8 | N/A | N/A | N/A | N/A | N/A | N/A | N/A | N/A | N/A | N/A | N/A | N/A | 1193 | 7.1 | 7327 | 7.3 | 701 | 8.6 | 16299 | 7.1 |
| Theil-Sen CI | 0.00–0.01 | | -0.00–0.03 | | -0.03–0.03 | | -0.02–0.00 | | 0.00–0.03 | | -0.05–-0.02* | | -0.07–0.15 | | 0.01–0.02* | | -0.17–0.06 | | -0.02–0.00 | | -0.01–0.01 | |
| SD (%) | 3.4 | | 3.6 | | 5.7 | | 4.2 | | 1.6 | | 6.0 | | 2.5 | | 2.6 | | 7.6 | | 3.5 | | 3.8 | |

(Permissible relative deviation in external quality assurance is 18.0 %.)

Center-specific median values for Platelet count over time

| Period | A | | B | | C | | D | | E | | F | | G | | H | | I | | J | | All | |
| --- | --- | --- | --- | --- | --- | --- | --- | --- | --- | --- | --- | --- | --- | --- | --- | --- | --- | --- | --- | --- | --- | --- |
| n | x̃ | n | x̃ | n | x̃ | n | x̃ | n | x̃ | n | **x̃** | **n** | **x̃** | **n** | **x̃** | **n** | **x̃** | **n** | **x̃** | **n** | **x̃** |
| Q1/08 | 20 | * | N/A | N/A | N/A | N/A | 5849 | 267 | N/A | N/A | 497 | 269 | N/A | N/A | N/A | N/A | N/A | N/A | 943 | 294 | 7309 | 272 |
| Q2/08 | 6186 | 251 | N/A | N/A | N/A | N/A | 5116 | 275 | N/A | N/A | 325 | 288 | N/A | N/A | N/A | N/A | N/A | N/A | 934 | 286 | 12561 | 265 |
| Q3/08 | 5513 | 245 | N/A | N/A | N/A | N/A | 4854 | 264 | N/A | N/A | 251 | 283 | N/A | N/A | 190 | 278 | N/A | N/A | 715 | 288 | 11523 | 257 |
| Q4/08 | 5389 | 250 | N/A | N/A | N/A | N/A | 4700 | 280 | N/A | N/A | 436 | 263 | N/A | N/A | 1444 | 281 | N/A | N/A | 739 | 297 | 12708 | 269 |
| Q1/09 | 5662 | 243 | N/A | N/A | N/A | N/A | 5261 | 268 | N/A | N/A | 640 | 260 | N/A | N/A | 1773 | 279 | N/A | N/A | 853 | 293 | 14189 | 263 |
| Q2/09 | 5483 | 250 | N/A | N/A | N/A | N/A | 4771 | 271 | N/A | N/A | 1442 | 277 | N/A | N/A | 1570 | 271 | N/A | N/A | 691 | 290 | 13957 | 265 |
| Q3/09 | 5567 | 246 | N/A | N/A | N/A | N/A | 4898 | 244 | N/A | N/A | 1418 | 278 | N/A | N/A | 1570 | 268 | N/A | N/A | 760 | 272 | 14213 | 254 |
| Q4/09 | 5769 | 240 | N/A | N/A | 26 | * | 4724 | 259 | N/A | N/A | 1530 | 269 | N/A | N/A | 1546 | 274 | N/A | N/A | 803 | 253 | 14398 | 255 |
| Q1/10 | 5695 | 245 | 5099 | 302 | 4468 | 234 | 4874 | 265 | N/A | N/A | 1256 | 279 | N/A | N/A | 1818 | 276 | N/A | N/A | 772 | 268 | 23982 | 264 |
| Q2/10 | 5516 | 241 | 4998 | 276 | 4528 | 230 | 4316 | 253 | N/A | N/A | 1271 | 267 | N/A | N/A | 1749 | 276 | N/A | N/A | 753 | 272 | 23131 | 255 |
| Q3/10 | 5799 | 241 | 5227 | 278 | 4774 | 214 | 4661 | 245 | N/A | N/A | 1373 | 252 | N/A | N/A | 1578 | 273 | N/A | N/A | 682 | 258 | 24094 | 250 |
| Q4/10 | 5875 | 243 | 5278 | 257 | 3924 | 240 | 4537 | 242 | N/A | N/A | 1523 | 260 | N/A | N/A | 1595 | 279 | N/A | N/A | 795 | 257 | 23527 | 251 |
| Q1/11 | 6218 | 240 | 5352 | 257 | 4348 | 220 | 4868 | 246 | N/A | N/A | 1450 | 267 | N/A | N/A | 1880 | 277 | N/A | N/A | 832 | 244 | 24948 | 248 |
| Q2/11 | 5106 | 241 | 5388 | 264 | 4301 | 221 | 4573 | 238 | N/A | N/A | 1374 | 260 | N/A | N/A | 1610 | 274 | N/A | N/A | 816 | 264 | 23168 | 248 |
| Q3/11 | 5855 | 230 | 5836 | 263 | 4591 | 204 | 4228 | 228 | N/A | N/A | 1410 | 267 | N/A | N/A | 1431 | 273 | N/A | N/A | 744 | 260 | 24095 | 242 |
| Q4/11 | 5769 | 238 | 5734 | 268 | 5085 | 213 | 4157 | 236 | 3707 | 271 | 1466 | 256 | N/A | N/A | 1543 | 276 | N/A | N/A | 742 | 258 | 28203 | 251 |
| Q1/12 | 6105 | 236 | 6324 | 265 | 5340 | 214 | 4951 | 224 | 6040 | 273 | 1685 | 264 | N/A | N/A | 1781 | 278 | N/A | N/A | 725 | 263 | 32951 | 252 |
| Q2/12 | 5486 | 247 | 5915 | 266 | 4810 | 218 | 4305 | 236 | 5547 | 276 | 1389 | 269 | N/A | N/A | 1569 | 272 | N/A | N/A | 754 | 259 | 29775 | 257 |
| Q3/12 | 5576 | 244 | 6107 | 253 | 4737 | 210 | 4311 | 233 | 5088 | 272 | 1456 | 256 | N/A | N/A | 1405 | 270 | 2 | * | 653 | 266 | 29335 | 250 |
| Q4/12 | 5564 | 246 | 5406 | 267 | 4674 | 230 | 4314 | 244 | 5807 | 278 | 1394 | 255 | N/A | N/A | 1484 | 277 | 125 | 263 | 729 | 257 | 29497 | 259 |
| Q1/13 | 6141 | 244 | 5756 | 264 | 4988 | 218 | 5184 | 241 | 5891 | 276 | 1439 | 254 | N/A | N/A | 1709 | 272 | 415 | 275 | 732 | 256 | 32255 | 256 |
| Q2/13 | 5725 | 251 | 5372 | 272 | 4939 | 214 | 4953 | 231 | 5966 | 279 | 1344 | 262 | N/A | N/A | 1766 | 280 | 506 | 254 | 658 | 261 | 31229 | 258 |
| Q3/13 | 6977 | 238 | 5433 | 250 | 4996 | 193 | 4633 | 226 | 5235 | 273 | 1303 | 267 | N/A | N/A | 1550 | 278 | 805 | 256 | 701 | 257 | 31633 | 247 |
| Q4/13 | 6354 | 244 | 5271 | 259 | 4774 | 209 | 4516 | 242 | 5848 | 274 | 1384 | 258 | N/A | N/A | 1588 | 281 | 883 | 256 | 608 | 260 | 31226 | 255 |
| Q1/14 | 6449 | 251 | 5701 | 258 | 5148 | 221 | 4901 | 251 | 6806 | 276 | 1542 | 259 | N/A | N/A | 1755 | 284 | 1121 | 265 | 681 | 258 | 34104 | 259 |
| Q2/14 | 6225 | 236 | 5536 | 260 | 4968 | 231 | 4422 | 244 | 6278 | 274 | 1662 | 254 | 3 | * | 1727 | 269 | 2137 | 264 | 646 | 260 | 33604 | 256 |
| Q3/14 | 6176 | 236 | 5670 | 258 | 5148 | 215 | 4145 | 245 | 5694 | 271 | 1484 | 261 | 4767 | 234 | 1716 | 272 | 1975 | 256 | 634 | 260 | 37409 | 250 |
| Q4/14 | 6551 | 236 | 5578 | 262 | 5028 | 227 | 4463 | 243 | 5932 | 273 | 1574 | 251 | 4822 | 240 | 1623 | 275 | 5751 | 248 | 692 | 259 | 42014 | 252 |
| Q1/15 | 7401 | 228 | 5714 | 274 | 5206 | 224 | 4824 | 242 | 6654 | 275 | 1663 | 245 | 4707 | 236 | 1919 | 280 | 6429 | 250 | 767 | 266 | 45284 | 252 |
| Q2/15 | 6509 | 244 | 5576 | 273 | 5484 | 214 | 4282 | 245 | 6154 | 274 | 1644 | 249 | 5105 | 230 | 2510 | 277 | 6023 | 252 | 644 | 264 | 43931 | 254 |
| Q3/15 | 7065 | 244 | N/A | N/A | N/A | N/A | N/A | N/A | 1 | * | 1664 | 228 | 4928 | 237 | 2421 | 273 | 6899 | 248 | 643 | 252 | 23621 | 248 |
| Q4/15 | 7135 | 242 | N/A | N/A | N/A | N/A | N/A | N/A | N/A | N/A | 1429 | 251 | 4345 | 249 | 2499 | 286 | 7496 | 255 | 694 | 264 | 23598 | 255 |
| Q1/16 | 8183 | 238 | N/A | N/A | N/A | N/A | N/A | N/A | N/A | N/A | N/A | N/A | 4936 | 233 | 2836 | 286 | 7310 | 265 | 755 | 253 | 24020 | 254 |
| Q2/16 | 7171 | 244 | N/A | N/A | N/A | N/A | N/A | N/A | N/A | N/A | N/A | N/A | 4597 | 242 | 2792 | 284 | 7397 | 262 | 669 | 267 | 22626 | 257 |
| Q3/16 | 7321 | 257 | N/A | N/A | N/A | N/A | N/A | N/A | N/A | N/A | N/A | N/A | N/A | N/A | 2417 | 280 | 6803 | 263 | 621 | 258 | 17162 | 263 |
| Q4/16 | 7078 | 260 | N/A | N/A | N/A | N/A | N/A | N/A | N/A | N/A | N/A | N/A | N/A | N/A | 1182 | 287 | 7245 | 265 | 701 | 266 | 16206 | 266 |
| Theil-Sen CI | -0.30–0.11 | | -1.00–0.50 | | -1.20–0.56 | | -1.74–-0.50* | | -0.40–0.33 | | -1.25–-0.56* | | -2.00–4.33 | | 0.00–0.40 | | -1.00–2.14 | | -0.95–-0.10* | | -0.41–0.10 | |
| SD (%) | 2.7 | | 4.0 | | 4.8 | | 5.9 | | 0.8 | | 4.5 | | 2.4 | | 1.8 | | 2.8 | | 4.8 | | 2.6 | |

(Permissible relative deviation in external quality assurance is 15.0 % for platelet counts 150-300 /nl.)

Center-specific median values for Mean red cell hemoglobin over time

| Period | A | | B | | C | | D | | E | | F | | G | | H | | I | | J | | All | |
| --- | --- | --- | --- | --- | --- | --- | --- | --- | --- | --- | --- | --- | --- | --- | --- | --- | --- | --- | --- | --- | --- | --- |
| n | x̃ | n | x̃ | n | x̃ | n | x̃ | n | x̃ | n | **x̃** | **n** | **x̃** | **n** | **x̃** | **n** | **x̃** | **n** | **x̃** | **n** | **x̃** |
| Q1/08 | 20 | * | N/A | N/A | N/A | N/A | 5852 | 29.1 | N/A | N/A | 4661 | 27.9 | N/A | N/A | N/A | N/A | N/A | N/A | 941 | 28.6 | 11474 | 28.5 |
| Q2/08 | 6192 | 28.5 | N/A | N/A | N/A | N/A | 5116 | 28.9 | N/A | N/A | 4572 | 27.9 | N/A | N/A | N/A | N/A | N/A | N/A | 932 | 28.1 | 16812 | 28.4 |
| Q3/08 | 5514 | 28.5 | N/A | N/A | N/A | N/A | 4853 | 29.0 | N/A | N/A | 4520 | 28.1 | N/A | N/A | 190 | 28.5 | N/A | N/A | 711 | 27.9 | 15788 | 28.5 |
| Q4/08 | 5389 | 28.1 | N/A | N/A | N/A | N/A | 4702 | 29.1 | N/A | N/A | 4793 | 27.8 | N/A | N/A | 1444 | 28.5 | N/A | N/A | 734 | 28.1 | 17062 | 28.3 |
| Q1/09 | 5665 | 28.1 | N/A | N/A | N/A | N/A | 5261 | 28.9 | N/A | N/A | 4892 | 28.1 | N/A | N/A | 1772 | 28.2 | N/A | N/A | 852 | 27.8 | 18442 | 28.2 |
| Q2/09 | 5484 | 28.3 | N/A | N/A | N/A | N/A | 4771 | 28.8 | N/A | N/A | 4671 | 28.0 | N/A | N/A | 1570 | 28.4 | N/A | N/A | 684 | 28.1 | 17180 | 28.4 |
| Q3/09 | 5575 | 28.3 | N/A | N/A | N/A | N/A | 4901 | 29.3 | N/A | N/A | 4963 | 28.1 | N/A | N/A | 1567 | 28.3 | N/A | N/A | 758 | 28.2 | 17764 | 28.5 |
| Q4/09 | 5773 | 28.3 | N/A | N/A | 26 | * | 4729 | 29.0 | N/A | N/A | 5040 | 28.2 | N/A | N/A | 1546 | 28.1 | N/A | N/A | 801 | 28.5 | 17915 | 28.5 |
| Q1/10 | 5696 | 28.1 | 5099 | 27.9 | 4468 | 27.9 | 4873 | 29.2 | N/A | N/A | 4911 | 28.2 | N/A | N/A | 1818 | 27.9 | N/A | N/A | 768 | 28.6 | 27633 | 28.2 |
| Q2/10 | 5517 | 28.3 | 4997 | 28.2 | 4528 | 28.1 | 4317 | 29.1 | N/A | N/A | 4636 | 27.8 | N/A | N/A | 1748 | 27.7 | N/A | N/A | 750 | 28.5 | 26493 | 28.3 |
| Q3/10 | 5799 | 28.3 | 5225 | 28.3 | 4776 | 28.2 | 4662 | 29.6 | N/A | N/A | 4585 | 27.9 | N/A | N/A | 1578 | 27.8 | N/A | N/A | 679 | 28.9 | 27304 | 28.4 |
| Q4/10 | 5884 | 28.3 | 5278 | 28.7 | 3929 | 28.0 | 4538 | 29.8 | N/A | N/A | 5018 | 27.9 | N/A | N/A | 1594 | 27.8 | N/A | N/A | 794 | 29.1 | 27035 | 28.5 |
| Q1/11 | 6219 | 28.0 | 5352 | 28.5 | 4348 | 28.0 | 4868 | 29.3 | N/A | N/A | 5145 | 27.9 | N/A | N/A | 1880 | 27.8 | N/A | N/A | 832 | 29.0 | 28644 | 28.3 |
| Q2/11 | 5120 | 28.2 | 5389 | 28.8 | 4301 | 28.2 | 4576 | 29.1 | N/A | N/A | 5409 | 27.8 | N/A | N/A | 1610 | 27.8 | N/A | N/A | 811 | 28.8 | 27216 | 28.4 |
| Q3/11 | 5859 | 28.3 | 5835 | 29.0 | 4590 | 28.4 | 4227 | 29.0 | N/A | N/A | 5094 | 27.9 | N/A | N/A | 1432 | 28.1 | N/A | N/A | 740 | 28.8 | 27777 | 28.5 |
| Q4/11 | 5775 | 28.2 | 5735 | 28.7 | 5051 | 28.1 | 4157 | 29.6 | 3708 | 28.6 | 5439 | 28.4 | N/A | N/A | 1543 | 28.1 | N/A | N/A | 738 | 29.1 | 32146 | 28.5 |
| Q1/12 | 6111 | 28.1 | 6323 | 28.4 | 5336 | 28.1 | 4950 | 29.1 | 6040 | 28.5 | 5355 | 28.2 | N/A | N/A | 1780 | 28.0 | N/A | N/A | 726 | 28.8 | 36621 | 28.4 |
| Q2/12 | 5486 | 28.2 | 5915 | 28.6 | 4809 | 28.2 | 4305 | 29.1 | 5547 | 28.2 | 5375 | 28.4 | N/A | N/A | 1569 | 28.0 | N/A | N/A | 751 | 29.1 | 33757 | 28.4 |
| Q3/12 | 5581 | 28.1 | 6107 | 28.6 | 4737 | 28.2 | 4311 | 29.6 | 5088 | 28.2 | 4999 | 28.4 | N/A | N/A | 1405 | 28.1 | 2 | * | 655 | 28.9 | 32885 | 28.5 |
| Q4/12 | 5572 | 28.1 | 5405 | 28.6 | 4674 | 27.9 | 4312 | 29.6 | 5808 | 28.4 | 4827 | 28.6 | N/A | N/A | 1484 | 28.0 | 125 | 28.1 | 729 | 28.9 | 32936 | 28.5 |
| Q1/13 | 6142 | 27.8 | 5755 | 28.5 | 4987 | 27.6 | 5184 | 29.1 | 5891 | 28.4 | 5246 | 28.5 | N/A | N/A | 1706 | 27.9 | 415 | 27.6 | 732 | 28.2 | 36058 | 28.3 |
| Q2/13 | 5726 | 28.5 | 5370 | 28.8 | 4939 | 27.7 | 4955 | 28.8 | 5966 | 28.4 | 4775 | 28.4 | N/A | N/A | 1766 | 28.1 | 506 | 28.4 | 664 | 27.8 | 34667 | 28.4 |
| Q3/13 | 6979 | 28.6 | 5433 | 28.6 | 4996 | 27.9 | 4634 | 28.8 | 5235 | 28.5 | 4997 | 27.9 | N/A | N/A | 1549 | 28.2 | 587 | 28.1 | 700 | 28.2 | 35110 | 28.4 |
| Q4/13 | 6355 | 28.7 | 5271 | 28.6 | 4773 | 28.4 | 4516 | 28.8 | 5848 | 28.5 | 4709 | 28.1 | N/A | N/A | 1588 | 28.0 | 497 | 28.3 | 608 | 27.6 | 34165 | 28.5 |
| Q1/14 | 6448 | 28.7 | 5701 | 28.7 | 5147 | 28.1 | 4903 | 28.7 | 6806 | 28.3 | 5019 | 27.8 | N/A | N/A | 1756 | 28.0 | 749 | 28.1 | 677 | 27.7 | 37206 | 28.4 |
| Q2/14 | 6226 | 28.3 | 5536 | 28.7 | 4967 | 27.7 | 4422 | 28.6 | 6280 | 28.3 | 4962 | 28.0 | 3 | * | 1728 | 28.1 | 1735 | 28.3 | 646 | 27.7 | 36505 | 28.2 |
| Q3/14 | 6182 | 28.5 | 5670 | 28.7 | 5149 | 28.1 | 4147 | 28.8 | 5694 | 28.3 | 4866 | 27.9 | 4767 | 28.1 | 1714 | 27.9 | 1599 | 28.8 | 634 | 27.5 | 40422 | 28.3 |
| Q4/14 | 6551 | 28.4 | 5578 | 28.4 | 5026 | 28.0 | 4461 | 28.5 | 5932 | 28.3 | 5184 | 28.1 | 4823 | 28.2 | 1623 | 28.2 | 5400 | 28.5 | 691 | 27.6 | 45269 | 28.3 |
| Q1/15 | 7407 | 28.5 | 5713 | 28.2 | 5205 | 28.0 | 4824 | 28.2 | 6654 | 28.3 | 5281 | 28.0 | 4707 | 28.2 | 1918 | 27.8 | 6056 | 28.4 | 766 | 27.5 | 48531 | 28.2 |
| Q2/15 | 6509 | 28.6 | 5577 | 28.3 | 5485 | 27.9 | 4283 | 28.4 | 6155 | 28.2 | 5256 | 27.8 | 5105 | 28.0 | 2511 | 27.9 | 5675 | 28.5 | 644 | 27.9 | 47200 | 28.2 |
| Q3/15 | 7070 | 28.7 | N/A | N/A | N/A | N/A | N/A | N/A | 1 | * | 5487 | 27.9 | 4928 | 28.1 | 2426 | 28.0 | 6542 | 28.5 | 641 | 27.9 | 27095 | 28.3 |
| Q4/15 | 7137 | 28.5 | N/A | N/A | N/A | N/A | N/A | N/A | N/A | N/A | 5597 | 28.0 | 4345 | 28.0 | 2500 | 28.0 | 7135 | 28.5 | 693 | 27.9 | 27407 | 28.3 |
| Q1/16 | 8185 | 28.4 | N/A | N/A | N/A | N/A | N/A | N/A | N/A | N/A | N/A | N/A | 4936 | 28.2 | 2836 | 27.8 | 6958 | 28.2 | 754 | 27.5 | 23669 | 28.2 |
| Q2/16 | 7168 | 28.5 | N/A | N/A | N/A | N/A | N/A | N/A | N/A | N/A | N/A | N/A | 4597 | 28.1 | 2799 | 28.0 | 7021 | 28.4 | 666 | 27.7 | 22251 | 28.3 |
| Q3/16 | 7323 | 27.8 | N/A | N/A | N/A | N/A | N/A | N/A | N/A | N/A | N/A | N/A | N/A | N/A | 2417 | 28.0 | 6486 | 28.4 | 620 | 27.7 | 16846 | 28.0 |
| Q4/16 | 7079 | 27.5 | N/A | N/A | N/A | N/A | N/A | N/A | N/A | N/A | N/A | N/A | N/A | N/A | 1182 | 27.8 | 7026 | 28.4 | 697 | 27.8 | 15984 | 28.0 |
| Theil-Sen CI | 0.00–0.01 | | -0.02–0.02 | | -0.02–0.01 | | -0.04–0.00 | | -0.02–0.00 | | -0.00–0.01 | | -0.05–0.05 | | -0.02–0.00 | | -0.03–0.03 | | -0.04–-0.01* | | -0.01–0.00 | |
| SD (%) | 0.9 | | 0.8 | | 0.7 | | 1.3 | | 0.4 | | 0.8 | | 0.3 | | 0.7 | | 0.9 | | 1.9 | | 0.5 | |

(Permissible relative deviation in external quality assurance is 6.0 %.)

Center-specific median values for Mean red cell hemoglobin concentration over time

| Period | A | | B | | C | | D | | E | | F | | G | | H | | I | | J | | All | |
| --- | --- | --- | --- | --- | --- | --- | --- | --- | --- | --- | --- | --- | --- | --- | --- | --- | --- | --- | --- | --- | --- | --- |
| n | x̃ | n | x̃ | n | x̃ | n | x̃ | n | x̃ | n | **x̃** | **n** | **x̃** | **n** | **x̃** | **n** | **x̃** | **n** | **x̃** | **n** | **x̃** |
| Q1/08 | 20 | * | N/A | N/A | N/A | N/A | 5852 | 34.3 | N/A | N/A | 2808 | 34.2 | N/A | N/A | N/A | N/A | N/A | N/A | 943 | 34.8 | 9623 | 34.4 |
| Q2/08 | 6192 | 33.4 | N/A | N/A | N/A | N/A | 5116 | 34.0 | N/A | N/A | 2840 | 34.4 | N/A | N/A | N/A | N/A | N/A | N/A | 931 | 34.2 | 15079 | 33.9 |
| Q3/08 | 5514 | 33.8 | N/A | N/A | N/A | N/A | 4853 | 34.1 | N/A | N/A | 3099 | 34.5 | N/A | N/A | 190 | 33.0 | N/A | N/A | 713 | 34.0 | 14369 | 34.1 |
| Q4/08 | 5389 | 33.2 | N/A | N/A | N/A | N/A | 4702 | 34.4 | N/A | N/A | 3303 | 34.3 | N/A | N/A | 1444 | 33.5 | N/A | N/A | 733 | 34.1 | 15571 | 33.9 |
| Q1/09 | 5665 | 33.2 | N/A | N/A | N/A | N/A | 5261 | 34.2 | N/A | N/A | 3546 | 34.0 | N/A | N/A | 1772 | 33.4 | N/A | N/A | 850 | 34.0 | 17094 | 33.8 |
| Q2/09 | 5484 | 33.4 | N/A | N/A | N/A | N/A | 4771 | 34.0 | N/A | N/A | 3391 | 34.3 | N/A | N/A | 1570 | 33.2 | N/A | N/A | 687 | 34.1 | 15903 | 33.8 |
| Q3/09 | 5575 | 33.7 | N/A | N/A | N/A | N/A | 4901 | 34.2 | N/A | N/A | 3692 | 34.3 | N/A | N/A | 1567 | 32.9 | N/A | N/A | 758 | 33.6 | 16493 | 33.9 |
| Q4/09 | 5773 | 33.2 | N/A | N/A | 26 | * | 4729 | 33.5 | N/A | N/A | 3544 | 34.4 | N/A | N/A | 1546 | 33.1 | N/A | N/A | 801 | 34.0 | 16419 | 33.6 |
| Q1/10 | 5696 | 33.1 | 5099 | 33.7 | 4468 | 34.0 | 4870 | 34.2 | N/A | N/A | 3520 | 34.1 | N/A | N/A | 1818 | 33.0 | N/A | N/A | 770 | 34.5 | 26241 | 33.8 |
| Q2/10 | 5517 | 33.2 | 4997 | 34.0 | 4528 | 34.4 | 4317 | 34.1 | N/A | N/A | 3233 | 33.6 | N/A | N/A | 1748 | 32.8 | N/A | N/A | 750 | 34.1 | 25090 | 33.8 |
| Q3/10 | 5799 | 33.3 | 5224 | 33.9 | 4776 | 34.3 | 4662 | 34.2 | N/A | N/A | 3210 | 33.6 | N/A | N/A | 1578 | 32.7 | N/A | N/A | 681 | 33.9 | 25930 | 33.8 |
| Q4/10 | 5884 | 33.0 | 5278 | 34.5 | 3929 | 33.8 | 4538 | 34.3 | N/A | N/A | 3398 | 33.9 | N/A | N/A | 1594 | 33.0 | N/A | N/A | 792 | 34.2 | 25413 | 33.8 |
| Q1/11 | 6219 | 33.2 | 5352 | 33.8 | 4348 | 33.7 | 4868 | 33.8 | N/A | N/A | 3537 | 33.6 | N/A | N/A | 1880 | 33.0 | N/A | N/A | 832 | 34.0 | 27036 | 33.6 |
| Q2/11 | 5120 | 33.2 | 5389 | 33.8 | 4301 | 34.3 | 4576 | 33.6 | N/A | N/A | 3780 | 33.6 | N/A | N/A | 1610 | 32.9 | N/A | N/A | 814 | 33.9 | 25590 | 33.6 |
| Q3/11 | 5859 | 33.4 | 5835 | 34.7 | 4590 | 34.6 | 4228 | 33.3 | N/A | N/A | 3478 | 33.9 | N/A | N/A | 1432 | 33.2 | N/A | N/A | 740 | 34.1 | 26162 | 33.9 |
| Q4/11 | 5775 | 33.1 | 5734 | 33.9 | 5051 | 34.1 | 4157 | 34.3 | 3707 | 34.5 | 3759 | 34.2 | N/A | N/A | 1543 | 33.3 | N/A | N/A | 742 | 34.3 | 30468 | 33.9 |
| Q1/12 | 6111 | 33.1 | 6323 | 33.2 | 5336 | 34.0 | 4950 | 33.8 | 6033 | 34.6 | 3787 | 34.2 | N/A | N/A | 1780 | 33.2 | N/A | N/A | 726 | 34.4 | 35046 | 33.8 |
| Q2/12 | 5486 | 33.3 | 5915 | 33.4 | 4809 | 34.0 | 4305 | 33.8 | 5544 | 34.4 | 3886 | 34.4 | N/A | N/A | 1569 | 33.2 | N/A | N/A | 753 | 34.1 | 32267 | 33.8 |
| Q3/12 | 5581 | 33.3 | 6106 | 33.2 | 4737 | 34.1 | 4311 | 34.4 | 5086 | 34.4 | 3475 | 35.0 | N/A | N/A | 1405 | 33.3 | 2 | * | 657 | 33.7 | 31360 | 33.9 |
| Q4/12 | 5572 | 32.6 | 5405 | 33.4 | 4674 | 33.9 | 4312 | 34.3 | 5804 | 34.6 | 3679 | 35.3 | N/A | N/A | 1484 | 33.3 | 125 | 34.1 | 729 | 34.0 | 31784 | 34.0 |
| Q1/13 | 6142 | 32.7 | 5755 | 34.1 | 4987 | 33.9 | 5184 | 33.7 | 5886 | 34.8 | 3780 | 35.1 | N/A | N/A | 1706 | 33.3 | 415 | 33.7 | 733 | 33.6 | 34588 | 33.9 |
| Q2/13 | 5726 | 33.3 | 5370 | 34.3 | 4939 | 33.8 | 4955 | 33.1 | 5959 | 34.9 | 3564 | 35.0 | N/A | N/A | 1766 | 33.3 | 506 | 33.7 | 662 | 33.4 | 33447 | 33.9 |
| Q3/13 | 6979 | 33.9 | 5433 | 33.8 | 4996 | 34.5 | 4634 | 33.0 | 5229 | 35.0 | 3677 | 34.1 | N/A | N/A | 1549 | 32.7 | 587 | 33.8 | 701 | 33.4 | 33785 | 34.0 |
| Q4/13 | 6355 | 33.7 | 5271 | 33.8 | 4773 | 34.6 | 4516 | 33.9 | 5842 | 35.0 | 3555 | 34.5 | N/A | N/A | 1588 | 32.8 | 497 | 33.9 | 608 | 33.6 | 33005 | 34.2 |
| Q1/14 | 6448 | 33.6 | 5701 | 34.1 | 5147 | 34.0 | 4903 | 34.6 | 6799 | 34.8 | 3771 | 34.3 | N/A | N/A | 1756 | 33.6 | 749 | 34.2 | 680 | 33.8 | 35954 | 34.2 |
| Q2/14 | 6225 | 33.8 | 5536 | 33.7 | 4967 | 33.7 | 4422 | 34.6 | 6268 | 34.7 | 3743 | 34.4 | 3 | * | 1728 | 33.6 | 1735 | 34.2 | 647 | 33.6 | 35274 | 34.1 |
| Q3/14 | 6182 | 34.0 | 5670 | 33.2 | 5149 | 34.1 | 4147 | 34.6 | 5690 | 34.7 | 3571 | 34.7 | 4767 | 34.3 | 1714 | 32.9 | 1599 | 34.3 | 634 | 33.1 | 39123 | 34.1 |
| Q4/14 | 6551 | 33.8 | 5578 | 33.3 | 5026 | 34.0 | 4460 | 34.5 | 5928 | 34.7 | 3979 | 34.5 | 4823 | 34.2 | 1623 | 33.2 | 5400 | 34.6 | 690 | 33.3 | 44058 | 34.2 |
| Q1/15 | 7407 | 33.8 | 5712 | 33.7 | 5205 | 33.9 | 4824 | 34.2 | 6648 | 34.7 | 4318 | 34.4 | 4707 | 34.4 | 1918 | 33.2 | 6056 | 34.7 | 767 | 33.4 | 47562 | 34.2 |
| Q2/15 | 6509 | 34.2 | 5577 | 33.7 | 5485 | 34.0 | 4283 | 34.2 | 6151 | 34.3 | 4029 | 34.3 | 5105 | 34.3 | 2511 | 33.3 | 5675 | 34.7 | 644 | 33.4 | 45969 | 34.2 |
| Q3/15 | 7070 | 34.2 | N/A | N/A | N/A | N/A | N/A | N/A | 1 | * | 4368 | 34.5 | 4928 | 34.6 | 2426 | 33.7 | 6542 | 34.8 | 643 | 33.5 | 25978 | 34.4 |
| Q4/15 | 7137 | 34.1 | N/A | N/A | N/A | N/A | N/A | N/A | N/A | N/A | 4437 | 34.7 | 4345 | 34.4 | 2500 | 33.6 | 7135 | 34.6 | 691 | 33.5 | 26245 | 34.3 |
| Q1/16 | 8185 | 33.8 | N/A | N/A | N/A | N/A | N/A | N/A | N/A | N/A | N/A | N/A | 4936 | 34.4 | 2836 | 33.6 | 6957 | 34.5 | 754 | 33.8 | 23668 | 34.1 |
| Q2/16 | 7168 | 33.8 | N/A | N/A | N/A | N/A | N/A | N/A | N/A | N/A | N/A | N/A | 4597 | 34.5 | 2799 | 33.8 | 7021 | 34.6 | 669 | 34.0 | 22254 | 34.2 |
| Q3/16 | 7323 | 33.2 | N/A | N/A | N/A | N/A | N/A | N/A | N/A | N/A | N/A | N/A | N/A | N/A | 2417 | 34.1 | 6484 | 34.6 | 621 | 33.8 | 16845 | 34.0 |
| Q4/16 | 7079 | 32.5 | N/A | N/A | N/A | N/A | N/A | N/A | N/A | N/A | N/A | N/A | N/A | N/A | 1182 | 34.1 | 7025 | 34.7 | 701 | 33.9 | 15987 | 33.8 |
| Theil-Sen CI | 0.00–0.03 | | -0.05–0.01 | | -0.03–0.01 | | -0.02–0.02 | | -0.02–0.04 | | 0.00–0.03 | | 0.00–0.08 | | 0.01–0.03* | | 0.00–0.07 | | -0.03–-0.01* | | 0.00–0.02 | |
| SD (%) | 1.3 | | 1.2 | | 0.8 | | 1.2 | | 0.6 | | 1.2 | | 0.3 | | 1.1 | | 1.1 | | 1.1 | | 0.6 | |

(Permissible relative deviation in external quality assurance is 6.0 %.)

Center-specific median values for Mean red cell volume over time

| Period | A | | B | | C | | D | | E | | F | | G | | H | | I | | J | | All | |
| --- | --- | --- | --- | --- | --- | --- | --- | --- | --- | --- | --- | --- | --- | --- | --- | --- | --- | --- | --- | --- | --- | --- |
| n | x̃ | n | x̃ | n | x̃ | n | x̃ | n | x̃ | n | **x̃** | **n** | **x̃** | **n** | **x̃** | **n** | **x̃** | **n** | **x̃** | **n** | **x̃** |
| Q1/08 | 20 | * | N/A | N/A | N/A | N/A | 5852 | 84 | N/A | N/A | 493 | 82 | N/A | N/A | N/A | N/A | N/A | N/A | 944 | 82 | 7309 | 84 |
| Q2/08 | 6192 | 84 | N/A | N/A | N/A | N/A | 5116 | 85 | N/A | N/A | 323 | 80 | N/A | N/A | N/A | N/A | N/A | N/A | 928 | 82 | 12559 | 84 |
| Q3/08 | 5514 | 84 | N/A | N/A | N/A | N/A | 4853 | 85 | N/A | N/A | 248 | 80 | N/A | N/A | 190 | 86 | N/A | N/A | 712 | 82 | 11517 | 84 |
| Q4/08 | 5389 | 84 | N/A | N/A | N/A | N/A | 4702 | 85 | N/A | N/A | 429 | 81 | N/A | N/A | 1444 | 85 | N/A | N/A | 733 | 83 | 12697 | 84 |
| Q1/09 | 5665 | 84 | N/A | N/A | N/A | N/A | 5261 | 84 | N/A | N/A | 634 | 83 | N/A | N/A | 1772 | 84 | N/A | N/A | 850 | 82 | 14182 | 84 |
| Q2/09 | 5484 | 84 | N/A | N/A | N/A | N/A | 4771 | 84 | N/A | N/A | 1435 | 81 | N/A | N/A | 1570 | 85 | N/A | N/A | 687 | 82 | 13947 | 84 |
| Q3/09 | 5575 | 84 | N/A | N/A | N/A | N/A | 4901 | 86 | N/A | N/A | 1416 | 81 | N/A | N/A | 1567 | 86 | N/A | N/A | 759 | 84 | 14218 | 84 |
| Q4/09 | 5774 | 85 | N/A | N/A | 26 | * | 4729 | 86 | N/A | N/A | 1496 | 81 | N/A | N/A | 1546 | 85 | N/A | N/A | 800 | 84 | 14371 | 85 |
| Q1/10 | 5697 | 85 | 5099 | 82 | 4468 | 82 | 4870 | 85 | N/A | N/A | 1248 | 81 | N/A | N/A | 1818 | 84 | N/A | N/A | 769 | 83 | 23969 | 84 |
| Q2/10 | 5516 | 85 | 4997 | 82 | 4528 | 81 | 4317 | 85 | N/A | N/A | 1262 | 83 | N/A | N/A | 1748 | 85 | N/A | N/A | 749 | 83 | 23117 | 84 |
| Q3/10 | 5799 | 85 | 5225 | 83 | 4776 | 82 | 4662 | 87 | N/A | N/A | 1366 | 82 | N/A | N/A | 1578 | 85 | N/A | N/A | 679 | 85 | 24085 | 84 |
| Q4/10 | 5884 | 85 | 5278 | 83 | 3929 | 83 | 4538 | 86 | N/A | N/A | 1514 | 82 | N/A | N/A | 1594 | 84 | N/A | N/A | 792 | 85 | 23529 | 84 |
| Q1/11 | 6220 | 84 | 5352 | 84 | 4348 | 83 | 4868 | 86 | N/A | N/A | 1442 | 82 | N/A | N/A | 1880 | 84 | N/A | N/A | 831 | 85 | 24941 | 84 |
| Q2/11 | 5120 | 84 | 5389 | 85 | 4301 | 82 | 4576 | 86 | N/A | N/A | 1361 | 82 | N/A | N/A | 1610 | 84 | N/A | N/A | 815 | 85 | 23172 | 84 |
| Q3/11 | 5859 | 84 | 5835 | 83 | 4590 | 82 | 4228 | 87 | N/A | N/A | 1408 | 81 | N/A | N/A | 1432 | 84 | N/A | N/A | 740 | 84 | 24092 | 84 |
| Q4/11 | 5775 | 85 | 5734 | 85 | 5051 | 82 | 4157 | 86 | 3707 | 83 | 1457 | 82 | N/A | N/A | 1543 | 84 | N/A | N/A | 742 | 85 | 28166 | 84 |
| Q1/12 | 6111 | 85 | 6323 | 85 | 5336 | 82 | 4950 | 86 | 6033 | 82 | 1671 | 81 | N/A | N/A | 1780 | 84 | N/A | N/A | 722 | 84 | 32926 | 84 |
| Q2/12 | 5486 | 85 | 5915 | 85 | 4810 | 82 | 4305 | 86 | 5544 | 82 | 1386 | 81 | N/A | N/A | 1569 | 84 | N/A | N/A | 752 | 85 | 29767 | 84 |
| Q3/12 | 5581 | 84 | 6107 | 86 | 4737 | 82 | 4311 | 86 | 5086 | 82 | 1447 | 80 | N/A | N/A | 1405 | 84 | 2 | * | 659 | 86 | 29335 | 84 |
| Q4/12 | 5572 | 86 | 5405 | 85 | 4674 | 82 | 4312 | 86 | 5804 | 82 | 1381 | 80 | N/A | N/A | 1484 | 84 | 125 | 82 | 730 | 85 | 29487 | 84 |
| Q1/13 | 6143 | 85 | 5755 | 83 | 4987 | 81 | 5184 | 86 | 5886 | 82 | 1412 | 81 | N/A | N/A | 1706 | 84 | 415 | 82 | 733 | 84 | 32221 | 83 |
| Q2/13 | 5734 | 85 | 5370 | 84 | 4939 | 81 | 4955 | 87 | 5959 | 81 | 1339 | 81 | N/A | N/A | 1766 | 84 | 506 | 84 | 664 | 83 | 31232 | 84 |
| Q3/13 | 6979 | 84 | 5433 | 84 | 4996 | 81 | 4634 | 87 | 5229 | 81 | 1295 | 81 | N/A | N/A | 1549 | 86 | 805 | 83 | 700 | 84 | 31620 | 83 |
| Q4/13 | 6355 | 84 | 5271 | 84 | 4773 | 81 | 4516 | 85 | 5842 | 81 | 1378 | 81 | N/A | N/A | 1588 | 85 | 883 | 82 | 607 | 82 | 31213 | 83 |
| Q1/14 | 6448 | 85 | 5701 | 84 | 5147 | 82 | 4903 | 83 | 6799 | 81 | 1514 | 80 | N/A | N/A | 1756 | 83 | 1120 | 82 | 678 | 82 | 34066 | 83 |
| Q2/14 | 6227 | 83 | 5537 | 85 | 4967 | 82 | 4422 | 83 | 6270 | 82 | 1639 | 81 | 3 | * | 1728 | 84 | 2137 | 82 | 644 | 83 | 33574 | 83 |
| Q3/14 | 6182 | 84 | 5670 | 86 | 5149 | 82 | 4147 | 83 | 5690 | 82 | 1479 | 80 | 4767 | 81 | 1714 | 85 | 1975 | 84 | 633 | 83 | 37406 | 83 |
| Q4/14 | 6552 | 84 | 5578 | 85 | 5026 | 82 | 4461 | 82 | 5928 | 82 | 1538 | 80 | 4823 | 82 | 1623 | 85 | 5751 | 82 | 691 | 82 | 41971 | 83 |
| Q1/15 | 7407 | 84 | 5713 | 83 | 5205 | 82 | 4824 | 82 | 6648 | 81 | 1653 | 81 | 4707 | 81 | 1918 | 84 | 6429 | 81 | 766 | 82 | 45270 | 82 |
| Q2/15 | 6511 | 83 | 5577 | 83 | 5485 | 81 | 4283 | 83 | 6151 | 82 | 1641 | 82 | 5105 | 81 | 2511 | 84 | 6022 | 82 | 643 | 83 | 43929 | 82 |
| Q3/15 | 7070 | 83 | N/A | N/A | N/A | N/A | N/A | N/A | 1 | * | 1647 | 81 | 4928 | 81 | 2426 | 83 | 6899 | 82 | 643 | 83 | 23614 | 82 |
| Q4/15 | 7137 | 83 | N/A | N/A | N/A | N/A | N/A | N/A | N/A | N/A | 1420 | 80 | 4345 | 81 | 2500 | 83 | 7496 | 82 | 693 | 83 | 23591 | 82 |
| Q1/16 | 8185 | 84 | N/A | N/A | N/A | N/A | N/A | N/A | N/A | N/A | N/A | N/A | 4936 | 82 | 2836 | 82 | 7354 | 81 | 755 | 81 | 24066 | 82 |
| Q2/16 | 7168 | 84 | N/A | N/A | N/A | N/A | N/A | N/A | N/A | N/A | N/A | N/A | 4597 | 81 | 2799 | 83 | 7464 | 82 | 669 | 81 | 22697 | 82 |
| Q3/16 | 7323 | 83 | N/A | N/A | N/A | N/A | N/A | N/A | N/A | N/A | N/A | N/A | N/A | N/A | 2417 | 82 | 6836 | 82 | 621 | 82 | 17197 | 82 |
| Q4/16 | 7079 | 85 | N/A | N/A | N/A | N/A | N/A | N/A | N/A | N/A | N/A | N/A | N/A | N/A | 1181 | 82 | 7326 | 82 | 701 | 81 | 16287 | 83 |
| Theil-Sen CI | -0.04–0.00 | | 0.00–0.15 | | 0.00–0.00 | | -0.09–0.00 | | -0.10–0.00 | | -0.06–0.00 | | 0.00–0.00 | | -0.09–0.00 | | 0.00–0.00 | | -0.10–0.00 | | -0.07–0.00 | |
| SD (%) | 0.9 | | 1.4 | | 0.7 | | 1.7 | | 0.7 | | 1.0 | | 0.5 | | 1.2 | | 1.0 | | 1.6 | | 1.0 | |

(Permissible relative deviation in external quality assurance is 8.0 %.)

Center-specific median values for Red cell distribution width over time

| Period | A | | B | | C | | D | | E | | F | | G | | H | | I | | J | | All | |
| --- | --- | --- | --- | --- | --- | --- | --- | --- | --- | --- | --- | --- | --- | --- | --- | --- | --- | --- | --- | --- | --- | --- |
| n | x̃ | n | x̃ | n | x̃ | n | x̃ | n | x̃ | n | **x̃** | **n** | **x̃** | **n** | **x̃** | **n** | **x̃** | **n** | **x̃** | **n** | **x̃** |
| Q1/08 | 20 | * | N/A | N/A | N/A | N/A | N/A | N/A | N/A | N/A | 290 | 13.9 | N/A | N/A | N/A | N/A | N/A | N/A | 913 | 13.5 | 1223 | 13.6 |
| Q2/08 | 6179 | 13.8 | N/A | N/A | N/A | N/A | N/A | N/A | N/A | N/A | 187 | 13.6 | N/A | N/A | N/A | N/A | N/A | N/A | 907 | 13.4 | 7273 | 13.8 |
| Q3/08 | 5493 | 13.5 | N/A | N/A | N/A | N/A | N/A | N/A | N/A | N/A | 173 | 13.9 | N/A | N/A | N/A | N/A | N/A | N/A | 689 | 13.3 | 6355 | 13.5 |
| Q4/08 | 5380 | 13.6 | N/A | N/A | N/A | N/A | N/A | N/A | N/A | N/A | 327 | 14.0 | N/A | N/A | N/A | N/A | N/A | N/A | 710 | 13.2 | 6417 | 13.5 |
| Q1/09 | 5651 | 13.7 | N/A | N/A | N/A | N/A | N/A | N/A | N/A | N/A | 501 | 14.2 | N/A | N/A | N/A | N/A | N/A | N/A | 840 | 13.4 | 6992 | 13.7 |
| Q2/09 | 5469 | 13.7 | N/A | N/A | N/A | N/A | N/A | N/A | N/A | N/A | 861 | 13.7 | N/A | N/A | N/A | N/A | N/A | N/A | 667 | 13.4 | 6997 | 13.7 |
| Q3/09 | 5557 | 13.8 | N/A | N/A | N/A | N/A | N/A | N/A | N/A | N/A | 817 | 13.5 | N/A | N/A | N/A | N/A | N/A | N/A | 747 | 13.4 | 7121 | 13.7 |
| Q4/09 | 5754 | 13.6 | N/A | N/A | N/A | N/A | N/A | N/A | N/A | N/A | 839 | 13.6 | N/A | N/A | N/A | N/A | N/A | N/A | 786 | 13.3 | 7379 | 13.6 |
| Q1/10 | 5677 | 13.8 | N/A | N/A | N/A | N/A | N/A | N/A | N/A | N/A | 672 | 13.5 | N/A | N/A | N/A | N/A | N/A | N/A | 763 | 13.4 | 7112 | 13.7 |
| Q2/10 | 5505 | 13.7 | N/A | N/A | N/A | N/A | N/A | N/A | N/A | N/A | 569 | 13.8 | N/A | N/A | N/A | N/A | N/A | N/A | 729 | 13.4 | 6803 | 13.7 |
| Q3/10 | 5794 | 13.5 | N/A | N/A | N/A | N/A | N/A | N/A | N/A | N/A | 742 | 13.5 | N/A | N/A | N/A | N/A | N/A | N/A | 666 | 13.4 | 7202 | 13.5 |
| Q4/10 | 5855 | 13.7 | N/A | N/A | N/A | N/A | N/A | N/A | N/A | N/A | 736 | 13.7 | N/A | N/A | N/A | N/A | N/A | N/A | 784 | 13.3 | 7375 | 13.6 |
| Q1/11 | 6194 | 13.9 | N/A | N/A | N/A | N/A | N/A | N/A | N/A | N/A | 643 | 14.4 | N/A | N/A | N/A | N/A | N/A | N/A | 816 | 13.4 | 7653 | 13.9 |
| Q2/11 | 5111 | 13.8 | N/A | N/A | N/A | N/A | N/A | N/A | N/A | N/A | 677 | 14.0 | N/A | N/A | N/A | N/A | N/A | N/A | 801 | 13.3 | 6589 | 13.8 |
| Q3/11 | 5783 | 13.7 | N/A | N/A | N/A | N/A | N/A | N/A | N/A | N/A | 641 | 13.4 | N/A | N/A | N/A | N/A | N/A | N/A | 727 | 13.3 | 7151 | 13.6 |
| Q4/11 | 5744 | 13.8 | N/A | N/A | N/A | N/A | N/A | N/A | 6 | * | 711 | 13.8 | N/A | N/A | N/A | N/A | N/A | N/A | 736 | 13.2 | 7197 | 13.7 |
| Q1/12 | 6093 | 13.9 | N/A | N/A | N/A | N/A | N/A | N/A | 20 | * | 870 | 13.9 | N/A | N/A | N/A | N/A | N/A | N/A | 723 | 13.3 | 7706 | 13.9 |
| Q2/12 | 5465 | 13.9 | N/A | N/A | N/A | N/A | N/A | N/A | 27 | * | 691 | 13.5 | N/A | N/A | N/A | N/A | N/A | N/A | 752 | 13.3 | 6935 | 13.8 |
| Q3/12 | 5560 | 14.0 | N/A | N/A | N/A | N/A | N/A | N/A | 43 | * | 719 | 13.6 | N/A | N/A | N/A | N/A | N/A | N/A | 655 | 13.3 | 6977 | 13.8 |
| Q4/12 | 5555 | 13.7 | N/A | N/A | N/A | N/A | 919 | 14.6 | 22 | * | 915 | 13.6 | N/A | N/A | N/A | N/A | N/A | N/A | 727 | 13.2 | 8138 | 13.7 |
| Q1/13 | 6128 | 14.1 | N/A | N/A | N/A | N/A | 1521 | 14.8 | N/A | N/A | 875 | 13.9 | N/A | N/A | N/A | N/A | N/A | N/A | 732 | 13.5 | 9256 | 14.0 |
| Q2/13 | 5716 | 14.2 | N/A | N/A | N/A | N/A | 1578 | 14.4 | 2 | * | 830 | 13.7 | N/A | N/A | N/A | N/A | N/A | N/A | 659 | 13.6 | 8785 | 14.1 |
| Q3/13 | 6954 | 14.0 | N/A | N/A | N/A | N/A | 1516 | 15.1 | 22 | * | 802 | 13.4 | N/A | N/A | N/A | N/A | N/A | N/A | 697 | 13.5 | 9991 | 14.0 |
| Q4/13 | 6347 | 13.9 | N/A | N/A | N/A | N/A | 759 | 14.4 | 46 | * | 914 | 13.6 | N/A | N/A | N/A | N/A | N/A | N/A | 607 | 13.5 | 8673 | 13.9 |
| Q1/14 | 6433 | 13.8 | N/A | N/A | N/A | N/A | N/A | N/A | 54 | * | 990 | 13.8 | N/A | N/A | N/A | N/A | N/A | N/A | 677 | 13.5 | 8154 | 13.8 |
| Q2/14 | 6214 | 13.8 | N/A | N/A | N/A | N/A | N/A | N/A | 65 | * | 1047 | 14.1 | 3 | * | N/A | N/A | N/A | N/A | 647 | 13.6 | 7976 | 13.8 |
| Q3/14 | 6168 | 13.9 | N/A | N/A | N/A | N/A | N/A | N/A | 47 | * | 870 | 13.7 | 4767 | 14.0 | N/A | N/A | N/A | N/A | 630 | 13.6 | 12482 | 13.9 |
| Q4/14 | 6547 | 13.9 | N/A | N/A | N/A | N/A | N/A | N/A | 43 | * | 987 | 14.5 | 4823 | 13.8 | N/A | N/A | N/A | N/A | 690 | 13.4 | 13090 | 13.9 |
| Q1/15 | 7395 | 14.2 | N/A | N/A | N/A | N/A | N/A | N/A | 64 | * | 1272 | 13.8 | 4707 | 13.9 | N/A | N/A | N/A | N/A | 767 | 13.6 | 14205 | 14.0 |
| Q2/15 | 6509 | 14.1 | N/A | N/A | N/A | N/A | N/A | N/A | 78 | * | 1167 | 14.1 | 5105 | 13.9 | N/A | N/A | N/A | N/A | 644 | 13.6 | 13503 | 14.0 |
| Q3/15 | 7061 | 14.1 | N/A | N/A | N/A | N/A | N/A | N/A | N/A | N/A | 1231 | 14.4 | 4928 | 13.9 | N/A | N/A | N/A | N/A | 643 | 13.6 | 13863 | 14.0 |
| Q4/15 | 7086 | 13.9 | N/A | N/A | N/A | N/A | N/A | N/A | N/A | N/A | 990 | 14.1 | 4345 | 13.8 | N/A | N/A | N/A | N/A | 695 | 13.5 | 13116 | 13.9 |
| Q1/16 | 8151 | 14.3 | N/A | N/A | N/A | N/A | N/A | N/A | N/A | N/A | N/A | N/A | 4936 | 14.2 | N/A | N/A | N/A | N/A | 754 | 13.6 | 13841 | 14.2 |
| Q2/16 | 7162 | 14.1 | N/A | N/A | N/A | N/A | N/A | N/A | N/A | N/A | N/A | N/A | 4597 | 14.1 | N/A | N/A | N/A | N/A | 667 | 13.7 | 12426 | 14.1 |
| Q3/16 | 7309 | 13.5 | N/A | N/A | N/A | N/A | N/A | N/A | N/A | N/A | N/A | N/A | N/A | N/A | N/A | N/A | N/A | N/A | 621 | 13.5 | 7930 | 13.5 |
| Q4/16 | 7070 | 13.2 | N/A | N/A | N/A | N/A | N/A | N/A | N/A | N/A | N/A | N/A | N/A | N/A | N/A | N/A | N/A | N/A | 698 | 13.5 | 7768 | 13.2 |
| Theil-Sen CI | 0.01–0.02* | |  | |  | | -0.70–0.70 | |  | | -0.00–0.02 | | -0.04–0.08 | |  | |  | | 0.00–0.01 | | 0.01–0.02* | |
| SD (%) | 1.6 | |  | |  | | 1.8 | |  | | 2.1 | | 0.9 | |  | |  | | 1.0 | | 1.5 | |

(Permissible relative deviation in external quality assurance is not specified.)
